# Supplementary material for: The expression of established cognitive brain states stabilizes with working memory development
Source: eLife journal article supplement (doi:10.7554/elife.25606), 2017-08-19
Supplement: supp [file elife-25606-supp-v1.zip]

Archive with 10 entries (10 files):
- elife_poa_e25606_Transparent_Reporting_File.pdf
- elife_poa_e25606_Figure_1_Source_data_1.zip
- elife_poa_e25606_Figure_2_Source_data_1.zip
- elife_poa_e25606_Figure_4_Source_data_1.zip
- elife_poa_e25606_Figure_6_Source_data_1.zip
- elife_poa_e25606_Figure_3_Source_data_1.zip
- elife_poa_e25606_Figure_7_Source_data_1.zip
- elife_poa_e25606_Figure_10_Source_data_1.zip
- elife_poa_e25606_Figure_8_Source_data_1.zip
- elife_poa_e25606_Figure_5_Source_data_1.zip
