# Supplementary material for: The expression of established cognitive brain states stabilizes with working memory development
Source: eLife journal article supplement (doi:10.7554/elife.25606), 2017-08-19
Supplement: supp [file Figure 1 Data.xlsx]

## Sheet: Figure 1
ID	Date	PI	DI	Age	Mean RT	RT STD	Precision(pix)	Accuracy (pix)
10124	20060803	-1	-1	13.566	701.389	344.397	40.375	17.089
10124	20060803	-1	1	13.566	430.769	133.307	58.1889	8.25842
10124	20060803	1	-1	13.566	626.923	281.492	65.378	7.97235
10124	20060803	1	1	13.566	379.487	54.4985	46.3643	20.3859
10124	20070829	-1	-1	14.6365	526.923	222.729	54.089	11.9603
10124	20070829	-1	1	14.6365	513.333	234.231	63.4338	19.9094
10124	20070829	1	-1	14.6365	448.718	84.2894	62.4134	0.221585
10124	20070829	1	1	14.6365	606.667	288.59	40.2149	13.6796
10125	20050809	-1	-1	16.5832	542.593	300.706	105.739	61.2752
10125	20050809	-1	1	16.5832	398.718	240.992	59.8803	13.574
10125	20050809	1	-1	16.5832	551.389	297.333	85.8462	17.4189
10125	20050809	1	1	16.5832	456.667	240.267	85.0663	16.9394
10125	20061021	-1	-1	17.7823	470.833	175.425	86.4819	38.5494
10125	20061021	-1	1	17.7823	474.242	317.924	106.687	29.6586
10125	20061021	1	-1	17.7823	483.333	137.885	66.7055	24.6476
10125	20061021	1	1	17.7823	438.889	108.012	52.3829	14.9457
10125	20070928	-1	-1	18.7187	544.444	224.771	103.714	11.5833
10125	20070928	-1	1	18.7187	442.308	83.5041	80.2408	20.7998
10125	20070928	1	-1	18.7187	442.857	76.7152	90.2159	19.4342
10125	20070928	1	1	18.7187	420.513	140.955	52.6927	9.88057
10128	20070808	-1	-1	20.5694	466.667	146.163	53.1579	11.1295
10128	20070808	-1	1	20.5694	427.778	93.0226	46.4092	24.5375
10128	20070808	1	-1	20.5694	576.19	209.059	37.7582	2.47814
10128	20070808	1	1	20.5694	438.095	120.793	49.4541	35.7229
10128	20080910	-1	-1	21.6618	527.273	133.598	31.4729	20.1729
10128	20080910	-1	1	21.6618	494.444	156.239	95.3834	9.1021
10128	20080910	1	-1	21.6618	694.872	202.46	117.327	14.2425
10128	20080910	1	1	21.6618	469.444	223.814	72.5449	17.3255
10128	20090827	-1	-1	22.6228	535.897	122.634	76.1285	21.8647
10128	20090827	-1	1	22.6228	484.722	192.598	144.184	8.17356
10128	20090827	1	-1	22.6228	596.429	145.91	76.2895	34.4009
10128	20090827	1	1	22.6228	479.487	110.795	125.993	52.9348
10128	20120418	-1	-1	25.2649	540.278	209.552	44.9247	17.3976
10128	20120418	-1	1	25.2649	419.048	102.502	38.6997	1.81792
10128	20120418	1	-1	25.2649	525.556	105.947	43.1356	11.6128
10128	20120418	1	1	25.2649	444.872	94.3753	39.2635	8.58332
10128	20130522	-1	-1	26.3573	481.481	55.5556	58.8278	3.75618
10128	20130522	-1	1	26.3573	415.385	95.8542	78.1698	13.7256
10128	20130522	1	-1	26.3573	494.872	153.416	53.7849	19.8954
10128	20130522	1	1	26.3573	418.519	220.864	77.6418	12.7156
10128	20140423	-1	-1	27.2772	488.889	108.789	112.895	19.6434
10128	20140423	-1	1	27.2772	516.667	268.397	76.51	20.7819
10128	20140423	1	-1	27.2772	533.333	168.49	98.458	17.5541
10128	20140423	1	1	27.2772	391.026	69.9257	60.0215	15.5286
10129	20070811	-1	-1	15.5865	753.03	251.641	58.8986	34.6224
10129	20070811	-1	1	15.5865	528.205	186.635	56.9235	37.3504
10129	20070811	1	-1	15.5865	750	246.306	72.4667	8.89856
10129	20070811	1	1	15.5865	533.333	157.165	38.9593	1.3844
10129	20081007	-1	-1	16.7447	713.333	248.551	80.1008	24.052
10129	20081007	-1	1	16.7447	491.667	129.393	150.252	2.09271
10129	20081007	1	-1	16.7447	640	195.347	102.173	14.3073
10129	20081007	1	1	16.7447	468.75	65.73	99.7276	26.2013
10129	20090825	-1	-1	17.6262	491.667	133.631	54.0707	11.3282
10129	20090825	-1	1	17.6262	470.37	111.111	61.8123	17.2566
10129	20090825	1	-1	17.6262	486.364	74.0939	62.2997	12.8267
10129	20090825	1	1	17.6262	437.5	75.9856	52.4044	9.91843
10130	20050809	-1	-1	14.5954	578.333	287.395	112.542	27.6875
10130	20050809	-1	1	14.5954	441.026	127.95	86.1603	16.3319
10130	20050809	1	-1	14.5954	500	233.333	60.5643	7.64264
10130	20050809	1	1	14.5954	393.056	106.472	93.832	23.1913
10132	20050816	-1	-1	17.6071	433.333	145.488	102.554	4.2208
10132	20050816	-1	1	17.6071	462.121	83.6962	95.4357	45.1832
10132	20050816	1	-1	17.6071	337.5	50.198	37.2506	0.642313
10132	20050816	1	1	17.6071	365.278	86.5904	75.7511	21.6159
10132	20061130	-1	-1	18.8966	375	135.107	58.8783	29.2492
10132	20061130	-1	1	18.8966	381.667	148.75	71.298	4.88055
10132	20061130	1	-1	18.8966	497.222	220.861	58.3556	7.28098
10132	20061130	1	1	18.8966	388.889	78.2812	58.5954	24.7413
10133	20071204	-1	-1	10.913	551.667	235.106	61.9372	12.0887
10133	20071204	-1	1	10.913	534.848	178.178	127.062	24.9387
10133	20071204	1	-1	10.913	768.056	224.56	62.5432	0.813474
10133	20071204	1	1	10.913	578.205	289.427	66.4535	13.0528
10133	20150804	-1	-1	18.579	465.476	103.87	62.1818	17.716
10133	20150804	-1	1	18.579	411.538	124.236	42.2813	10.0389
10133	20150804	1	-1	18.579	529.487	139.137	74.5272	3.61359
10133	20150804	1	1	18.579	473.333	199.384	52.7778	15.7935
10134	20111217	-1	-1	28.9555	395.455	117.4	43.3251	7.6714
10134	20111217	-1	1	28.9555	412.963	83.6568	163.504	5.61873
10134	20111217	1	-1	28.9555	417.949	102.619	115.798	41.7521
10134	20111217	1	1	28.9555	401.515	39.7594	134.972	55.5962
10134	20130323	-1	-1	30.2204	389.744	52.0588	97.8406	2.33633
10134	20130323	-1	1	30.2204	490.741	238.064	121.92	11.5601
10134	20130323	1	-1	30.2204	412.5	88.7981	114.908	23.8097
10134	20130323	1	1	30.2204	501.515	264.203	157.879	6.98906
10134	20140118	-1	-1	31.0444	429.63	104.009	45.1252	9.83567
10134	20140118	-1	1	31.0444	388.333	64.8122	49.5336	7.70111
10134	20140118	1	-1	31.0444	402.778	101.711	47.0816	16.3919
10134	20140118	1	1	31.0444	435.417	104.819	56.6664	28.8942
10136	20060715	-1	-1	15.5346	658.333	267.735	59.4109	11.1989
10136	20060715	-1	1	15.5346	461.667	227.174	51.9911	7.39109
10136	20060715	1	-1	15.5346	528.205	179.813	51.9631	3.76053
10136	20060715	1	1	15.5346	429.487	83.9295	37.1001	0.126475
10136	20080804	-1	-1	17.5907	498.333	108.141	32.4193	15.3126
10136	20080804	-1	1	17.5907	415	102.575	87.459	36.8378
10136	20080804	1	-1	17.5907	623.333	125.019	60.3665	18.9727
10136	20080804	1	1	17.5907	451.667	102.274	46.1328	1.99752
10136	20090716	-1	-1	18.538	553.03	170.101	53.559	12.3939
10136	20090716	-1	1	18.538	388.333	90.6254	38.3958	30.0609
10136	20090716	1	-1	18.538	489.286	141.362	48.8636	0.96545
10136	20090716	1	1	18.538	423.611	154.472	53.1037	32.0099
10136	20120814	-1	-1	21.6181	441.667	71.686	34.3959	9.65298
10136	20120814	-1	1	21.6181	466.667	174.801	79.6316	3.02501
10136	20120814	1	-1	21.6181	540.278	154.144	37.3822	8.53145
10136	20120814	1	1	21.6181	410	65.3575	73.4913	23.0828
10136	20140118	-1	-1	23.0472	421.795	104.391	26.4758	1.13762
10136	20140118	-1	1	23.0472	380.556	52.6247	39.9438	12.4161
10136	20140118	1	-1	23.0472	433.333	82.6898	30.7688	2.08866
10136	20140118	1	1	23.0472	402.381	74.7809	34.2412	0.781873
10138	20100213	-1	-1	21.1143	564.286	145.423	33.4911	9.71409
10138	20100213	-1	1	21.1143	384.444	78.7972	42.9466	12.784
10138	20100213	1	-1	21.1143	530	119.722	46.9174	7.09867
10138	20100213	1	1	21.1143	382.222	62.191	70.0654	2.09584
10138	20120416	-1	-1	23.2854	480.303	120.374	52.8919	26.5136
10138	20120416	-1	1	23.2854	445.455	114.283	38.6803	3.56554
10138	20120416	1	-1	23.2854	610.714	114.468	35.1514	14.7505
10138	20120416	1	1	23.2854	385.185	97.3412	45.8234	9.03549
10138	20141111	-1	-1	25.8562	596.154	229.951	42.4549	6.65566
10138	20141111	-1	1	25.8562	539.394	280.503	37.6908	18.8396
10138	20141111	1	-1	25.8562	716.667	317.105	50.4821	2.96283
10138	20141111	1	1	25.8562	445	198.614	74.2968	33.7869
10145	20050802	-1	-1	15.5592	644.444	267.926	71.0972	10.6274
10145	20050802	-1	1	15.5592	464.103	157.505	100.09	3.4309
10145	20050802	1	-1	15.5592	634.848	196.844	20.7418	3.35546
10145	20050802	1	1	15.5592	640.278	305.047	145.628	5.59797
10148	20070315	-1	-1	15.1704	354.444	45.1921	62.4469	25.9964
10148	20070315	-1	1	15.1704	379.762	68.6184	76.9975	13.3191
10148	20070315	1	-1	15.1704	385.556	57.3442	45.7828	15.7676
10148	20070315	1	1	15.1704	364.286	64.0036	57.0125	11.5622
10148	20070811	-1	-1	15.5784	393.056	131.706	15.1457	2.8139
10148	20070811	-1	1	15.5784	353.846	54.4985	46.3011	12.1622
10148	20070811	1	-1	15.5784	352.222	58.7119	39.2318	11.0518
10148	20070811	1	1	15.5784	338.095	33.6069	43.7373	5.8848
10148	20080819	-1	-1	16.6023	319.231	41.3018	42.1663	7.62912
10148	20080819	-1	1	16.6023	362.5	44.4523	44.4098	4.50826
10148	20080819	1	-1	16.6023	323.333	66.0087	34.5416	5.18467
10148	20080819	1	1	16.6023	343.056	62.9487	84.8774	12.7385
10148	20090826	-1	-1	17.6208	317.949	62.1608	73.1524	8.10741
10148	20090826	-1	1	17.6208	322.727	40.3269	46.9798	8.44719
10148	20090826	1	-1	17.6208	307.143	30.4625	46.5851	16.6131
10148	20090826	1	1	17.6208	337.879	37.3355	78.6249	11.517
10148	20120815	-1	-1	20.5914	337.879	86.3105	117.884	92.2594
10148	20120815	-1	1	20.5914	326.923	33.7052	55.6863	9.28112
10148	20120815	1	-1	20.5914	330	52.0226	95.375	16.4046
10148	20120815	1	1	20.5914	312.5	43.8806	68.8423	0.419303
10148	20130810	-1	-1	21.577	283.333	20.4124	34.1359	15.4481
10148	20130810	-1	1	21.577	379.63	247.316	112.009	45.9942
10148	20130810	1	-1	21.577	312.121	109.314	80.2978	1.04614
10148	20130810	1	1	21.577	360	113.093	78.5331	28.4398
10148	20151215	-1	-1	23.9233	301.111	40.5648	36.442	11.821
10148	20151215	-1	1	23.9233	304.762	35.4631	49.4192	9.66741
10148	20151215	1	-1	23.9233	380.556	170.239	27.0146	4.45788
10148	20151215	1	1	23.9233	326.389	32.9204	48.3319	8.0934
10152	20050815	-1	-1	12.6078	768.333	344.216	46.2834	7.71177
10152	20050815	-1	1	12.6078	694.444	313.138	62.06	14.6487
10152	20050815	1	-1	12.6078	812.5	172.931	57.9687	10.3994
10152	20050815	1	1	12.6078	452.778	148.48	51.4978	9.22215
10152	20120307	-1	-1	19.1677	476.667	113.909	61.3287	1.37969
10152	20120307	-1	1	19.1677	396.97	86.5442	65.3512	1.52588
10152	20120307	1	-1	19.1677	448.611	93.8671	16.9292	17.3264
10152	20120307	1	1	19.1677	440	162.199	65.2094	5.9407
10152	20130305	-1	-1	20.1615	490.278	98.3342	27.2661	5.90581
10152	20130305	-1	1	20.1615	368.182	53.9828	49.9041	6.6996
10152	20130305	1	-1	20.1615	429.167	76.2522	40.8157	3.5588
10152	20130305	1	1	20.1615	404.545	94.8949	40.6776	13.3088
10152	20140312	-1	-1	21.18	468.333	113.434	30.3686	11.8252
10152	20140312	-1	1	21.18	456.944	84.5243	40.3514	7.72123
10152	20140312	1	-1	21.18	414.815	88.3665	54.1718	8.61548
10152	20140312	1	1	21.18	412.5	64.7032	35.9618	38.7689
10152	20150312	-1	-1	22.1793	433.333	106.284	34.4228	9.60882
10152	20150312	-1	1	22.1793	433.333	97.9958	63.8967	18.9835
10152	20150312	1	-1	22.1793	441.026	123.156	41.0522	5.47812
10152	20150312	1	1	22.1793	433.333	130.018	37.6749	13.6124
10153	20050815	-1	-1	10.6064	748.889	333.48	47.3935	24.5074
10153	20050815	-1	1	10.6064	561.905	159.785	106.865	6.45154
10153	20050815	1	-1	10.6064	593.056	217.824	76.6728	42.3336
10153	20050815	1	1	10.6064	611.905	193.641	51.4483	31.9282
10153	20081104	-1	-1	13.8289	603.571	194.055	44.314	12.399
10153	20081104	-1	1	13.8289	514.286	144.834	45.518	18.5606
10153	20081104	1	-1	13.8289	609.722	236.82	86.247	20.7019
10153	20081104	1	1	13.8289	361.905	105.496	32.033	14.9279
10153	20090728	-1	-1	14.5571	428.333	118.387	38.0018	14.9081
10153	20090728	-1	1	14.5571	386.667	101.166	50.3486	11.5765
10153	20090728	1	-1	14.5571	480.769	105.814	47.8326	16.7562
10153	20090728	1	1	14.5571	371.212	48.9279	53.2751	13.4191
10156	20060826	-1	-1	13.6482	475	153.987	58.868	28.311
10156	20060826	-1	1	13.6482	505.556	201.3	69.9625	13.8719
10156	20060826	1	-1	13.6482	539.286	227.454	109.674	20.4338
10156	20060826	1	1	13.6482	481.944	148.81	102.012	33.1026
10156	20070707	-1	-1	14.5106	359.722	164.755	34.9341	29.9154
10156	20070707	-1	1	14.5106	372.222	68.6572	32.2017	11.5688
10156	20070707	1	-1	14.5106	355.556	107.028	53.7835	9.4611
10156	20070707	1	1	14.5106	410.256	141.509	49.6384	32.365
10156	20080703	-1	-1	15.5017	363.095	59.9781	55.9007	19.5452
10156	20080703	-1	1	15.5017	413.095	204.143	41.0937	0.770015
10156	20080703	1	-1	15.5017	472.222	256.632	59.1271	4.7643
10156	20080703	1	1	15.5017	396.667	75.9072	41.338	3.73645
10156	20090711	-1	-1	16.5229	425.641	103.552	59.7013	40.1231
10156	20090711	-1	1	16.5229	396.97	56.1833	73.9433	7.23038
10156	20090711	1	-1	16.5229	440	112.476	61.9734	28.9277
10156	20090711	1	1	16.5229	421.212	70.7464	59.8739	23.9991
10156	20130112	-1	-1	20.0301	375.641	54.2693	142.398	8.12105
10156	20130112	-1	1	20.0301	398.718	97.0542	95.1479	41.7634
10156	20130112	1	-1	20.0301	382.051	68.1982	33.3924	24.8796
10156	20130112	1	1	20.0301	369.444	65.8408	30.4076	27.5143
10156	20141025	-1	-1	21.8124	327.273	59.7554	133.136	6.95544
10156	20141025	-1	1	21.8124	366.667	42.8174	43.9892	37.4514
10156	20141025	1	-1	21.8124	348.485	48.5653	57.4398	21.7447
10156	20141025	1	1	21.8124	348.148	60.3488	41.3	12.8752
10156	20151109	-1	-1	22.8528	357.576	53.4185	40.8463	10.5459
10156	20151109	-1	1	22.8528	402.778	63.8944	86.4661	20.8622
10156	20151109	1	-1	22.8528	391.111	57.6892	70.4422	4.80962
10156	20151109	1	1	22.8528	379.167	60.3546	63.1193	13.7399
10161	20051111	-1	-1	16.8432	448.611	195.461	58.1138	25.4019
10161	20051111	-1	1	16.8432	363.333	141.449	81.2668	9.24368
10161	20051111	1	-1	16.8432	514.444	155.949	46.0159	2.36713
10161	20051111	1	1	16.8432	297.619	54.2459	72.7176	24.6215
10161	20070719	-1	-1	18.527	436.111	73.1103	67.4558	11.1756
10161	20070719	-1	1	18.527	332.051	60.6529	127.148	13.8938
10161	20070719	1	-1	18.527	433.333	87.7406	66.7036	11.1285
10161	20070719	1	1	18.527	305.556	21.7113	71.6671	5.58294
10161	20081023	-1	-1	19.7919	395.238	98.8024	11.2504	19.7799
10161	20081023	-1	1	19.7919	321.795	41.6025	38.9068	11.0769
10161	20081023	1	-1	19.7919	396.667	48.0575	42.897	14.9637
10161	20081023	1	1	19.7919	328.889	98.0902	33.4296	21.5192
10161	20090820	-1	-1	20.616	448.333	199.142	92.8304	70.1357
10161	20090820	-1	1	20.616	325.926	104.785	95.0506	19.0993
10161	20090820	1	-1	20.616	386.364	52.078	51.0717	16.0775
10161	20090820	1	1	20.616	323.333	37.8431	63.347	1.89189
10161	20130605	-1	-1	24.4079	392.308	64.4116	82.3768	24.8381
10161	20130605	-1	1	24.4079	373.077	202.02	126.583	26.1473
10161	20130605	1	-1	24.4079	373.077	54.6616	52.573	32.5536
10161	20130605	1	1	24.4079	321.212	26.968	128.07	80.3156
10161	20150602	-1	-1	26.3983	356.41	48.8471	83.2124	13.5411
10161	20150602	-1	1	26.3983	311.111	60.4417	27.2454	2.51784
10161	20150602	1	-1	26.3983	365.556	95.4244	27.7564	11.2115
10161	20150602	1	1	26.3983	312.821	47.2159	49.9484	0.0248309
10162	20050921	-1	-1	17.7029	762.5	262.127	95.4933	77.3235
10162	20050921	-1	1	17.7029	520.833	135.327	133.174	12.4215
10162	20050921	1	-1	17.7029	652.083	185.472	150.131	103.762
10162	20050921	1	1	17.7029	631.25	279.091	130.093	5.97239
10162	20061220	-1	-1	18.9486	477.778	112.89	68.3949	24.0834
10162	20061220	-1	1	18.9486	421.429	111.981	110.425	41.1101
10162	20061220	1	-1	18.9486	491.667	122.081	98.9713	1.19087
10162	20061220	1	1	18.9486	387.5	48.7858	56.6621	20.8092
10162	20071219	-1	-1	19.9452	640.278	143.277	75.0309	15.5987
10162	20071219	-1	1	19.9452	569.048	221.77	100.735	6.08377
10162	20071219	1	-1	19.9452	511.667	149.907	60.5202	12.6039
10162	20071219	1	1	19.9452	548.485	164.225	64.8523	5.26188
10162	20081215	-1	-1	20.9363	511.111	160.933	37.4145	5.3846
10162	20081215	-1	1	20.9363	412.222	83.6818	40.0038	0.438612
10162	20081215	1	-1	20.9363	500	81.4063	36.6934	2.94924
10162	20081215	1	1	20.9363	503.571	234.446	41.6834	30.0809
10163	20060731	-1	-1	20.5695	397.222	144.396	29.6593	28.2292
10163	20060731	-1	1	20.5695	381.944	85.1197	74.6644	25.7168
10163	20060731	1	-1	20.5695	436.111	141.213	49.6646	4.21125
10163	20060731	1	1	20.5695	317.949	64.3563	67.0836	16.7086
10163	20070712	-1	-1	21.5168	352.564	56.0449	71.4126	0.508436
10163	20070712	-1	1	21.5168	386.905	67.6778	91.1201	6.88743
10163	20070712	1	-1	21.5168	358.333	71.8349	88.3486	37.324
10163	20070712	1	1	21.5168	355	58.8207	42.1458	6.10763
10163	20091010	-1	-1	23.7645	401.389	222.186	59.6366	32.4238
10163	20091010	-1	1	23.7645	327.273	77.1984	31.8962	17.9882
10163	20091010	1	-1	23.7645	407.143	121.02	61.612	16.5772
10163	20091010	1	1	23.7645	352.778	62.6975	64.2287	35.0668
10169	20051102	-1	-1	11.8302	576.667	305.121	58.3563	4.01581
10169	20051102	-1	1	11.8302	484.615	155.078	110.298	29.132
10169	20051102	1	-1	11.8302	513.636	126.011	49.0208	20.5733
10169	20051102	1	1	11.8302	560	144.701	68.4438	12.754
10169	20070303	-1	-1	13.1608	450	111.305	61.2969	26.2506
10169	20070303	-1	1	13.1608	470.238	173.72	80.4286	37.4859
10169	20070303	1	-1	13.1608	492.857	205.243	46.4154	19.5176
10169	20070303	1	1	13.1608	442.308	75.6501	39.3507	2.65173
10173	20061207	-1	-1	14.9131	378.333	62.3857	139.945	36.5704
10173	20061207	-1	1	14.9131	434.722	114.693	99.4868	50.1906
10173	20061207	1	-1	14.9131	462.121	110.326	90.5989	25.6939
10173	20061207	1	1	14.9131	433.333	75.2773	124.758	22.4115
10173	20070818	-1	-1	15.6085	388.462	136.996	72.9361	21.2754
10173	20070818	-1	1	15.6085	393.939	107.05	72.2083	0.55905
10173	20070818	1	-1	15.6085	403.704	119.831	102.302	27.446
10173	20070818	1	1	15.6085	352.564	51.3007	70.884	28.3528
10173	20090121	-1	-1	17.0376	369.048	74.7809	36.3112	21.9707
10173	20090121	-1	1	17.0376	343.056	52.4445	51.696	0.261149
10173	20090121	1	-1	17.0376	343.939	36.7217	51.0933	2.81652
10173	20090121	1	1	17.0376	370.833	47.7393	63.919	9.40359
10173	20090826	-1	-1	17.6317	464.444	185.043	53.4139	9.5475
10173	20090826	-1	1	17.6317	346.667	58.8245	52.3562	27.8529
10173	20090826	1	-1	17.6317	371.111	76.2376	68.4625	17.8711
10173	20090826	1	1	17.6317	338.095	53.6802	62.5933	15.2649
10173	20120515	-1	-1	20.3504	347.222	58.1346	91.2128	58.2219
10173	20120515	-1	1	20.3504	361.905	31.497	82.9505	89.7743
10173	20120515	1	-1	20.3504	355.556	53.4027	106.312	93.9684
10173	20120515	1	1	20.3504	323.333	103.816	163.808	4.22396
10173	20130523	-1	-1	21.3716	304.444	25.5625	39.7224	24.4916
10173	20130523	-1	1	21.3716	336.905	109.228	46.3767	3.14845
10173	20130523	1	-1	21.3716	321.111	44.7509	37.2279	8.32794
10173	20130523	1	1	21.3716	378.889	72.2283	51.6857	5.48623
10173	20150527	-1	-1	23.3812	325	61.7213	71.7194	42.2532
10173	20150527	-1	1	23.3812	418.333	116.123	75.3353	2.84277
10173	20150527	1	-1	23.3812	351.515	68.9019	65.7131	40.1553
10173	20150527	1	1	23.3812	373.333	93.3598	105.088	23.6535
10173	20160511	-1	-1	24.3395	266.667	47.9749	27.1194	0.436184
10173	20160511	-1	1	24.3395	286.905	49.8624	37.7751	4.11503
10173	20160511	1	-1	24.3395	283.333	37.2678	54.9304	2.85974
10173	20160511	1	1	24.3395	384.524	161.651	54.672	3.73124
10174	20070509	-1	-1	20.3231	586.364	156.847	60.7474	14.4454
10174	20070509	-1	1	20.3231	465	139.985	56.9983	61.0527
10174	20070509	1	-1	20.3231	579.167	129.514	76.7995	0.103414
10174	20070509	1	1	20.3231	478.788	203.045	54.0996	20.4735
10174	20080828	-1	-1	21.629	598.485	326.297	113.591	39.9296
10174	20080828	-1	1	21.629	377.273	67.607	59.4013	14.8932
10174	20080828	1	-1	21.629	394.444	85.6742	55.2542	43.134
10174	20080828	1	1	21.629	388.333	24.9072	66.3858	20.3422
10174	20150411	-1	-1	28.2464	401.282	77.1187	35.2218	2.14049
10174	20150411	-1	1	28.2464	366.667	60.4765	42.1811	4.12663
10174	20150411	1	-1	28.2464	432.143	62.1771	57.8005	8.66655
10174	20150411	1	1	28.2464	354.167	38.3531	35.6337	3.95013
10175	20061113	-1	-1	16.835	544.444	275.787	52.7846	2.01554
10175	20061113	-1	1	16.835	351.111	48.5777	57.9016	4.85734
10175	20061113	1	-1	16.835	555.556	138.968	74.9156	29.3562
10175	20061113	1	1	16.835	365.556	83.2063	46.9658	0.44206
10175	20081218	-1	-1	18.9322	473.611	155.124	45.4696	29.4643
10175	20081218	-1	1	18.9322	451.282	122.939	55.7364	12.485
10175	20081218	1	-1	18.9322	508.974	267.413	97.9335	3.85928
10175	20081218	1	1	18.9322	424.359	146.189	43.6405	6.09832
10175	20100608	-1	-1	20.4025	451.389	96.5198	28.1016	0.289974
10175	20100608	-1	1	20.4025	387.778	52.5035	46.1075	14.6097
10175	20100608	1	-1	20.4025	468.889	70.3919	21.7592	13.3067
10175	20100608	1	1	20.4025	403.846	49.1379	32.8166	27.4178
10176	20061106	-1	-1	18.8309	490.278	200.94	46.9951	10.1214
10176	20061106	-1	1	18.8309	347.436	96.9073	41.6898	29.1979
10176	20061106	1	-1	18.8309	532.143	229.032	61.202	7.04548
10176	20061106	1	1	18.8309	458.974	173.421	84.5759	36.766
10176	20080818	-1	-1	20.6132	428.205	95.1083	57.9748	17.1638
10176	20080818	-1	1	20.6132	355.952	76.6854	64.0601	9.60971
10176	20080818	1	-1	20.6132	438.889	110.858	59.9088	6.00798
10176	20080818	1	1	20.6132	339.286	60.8372	64.0243	1.12545
10176	20090601	-1	-1	21.399	428.788	206.168	104.264	89.2356
10176	20090601	-1	1	21.399	375	54.8183	187.189	40.2129
10176	20090601	1	-1	21.399	446.154	163.604	98.632	86.3769
10176	20090601	1	1	21.399	377.273	63.8021	161.378	63.3357
10177	20070329	-1	-1	18.2204	415.385	102.167	60.4886	23.7316
10177	20070329	-1	1	18.2204	365.476	49.1223	99.918	11.7797
10177	20070329	1	-1	18.2204	489.286	189.76	70.3785	18.6562
10177	20070329	1	1	18.2204	382.143	77.2011	51.9259	4.58599
10180	20050920	-1	-1	19.707	476.389	132.47	79.8028	13.7378
10180	20050920	-1	1	19.707	415.278	106.472	46.0492	23.6158
10180	20050920	1	-1	19.707	529.63	120.121	68.5622	7.44265
10180	20050920	1	1	19.707	391.026	88.0907	87.7198	23.1465
10180	20070113	-1	-1	21.0212	502.778	205.214	44.5236	1.6396
10180	20070113	-1	1	21.0212	368.519	50.9932	102.291	21.729
10180	20070113	1	-1	21.0212	488.333	91.6414	17.1212	3.73328
10180	20070113	1	1	21.0212	391.026	59.1668	34.7201	20.1729
10181	20051212	-1	-1	12.9172	518.056	200.814	77.8044	17.7618
10181	20051212	-1	1	12.9172	535	166.935	64.9003	21.0065
10181	20051212	1	-1	12.9172	506.667	218.2	96.0033	23.583
10181	20051212	1	1	12.9172	484.722	88.8928	80.8585	34.4088
10181	20061216	-1	-1	13.9274	445.455	203.045	63.1742	24.7746
10181	20061216	-1	1	13.9274	470	90.1987	83.1702	1.72131
10181	20061216	1	-1	13.9274	453.846	124.565	78.8647	18.3576
10181	20061216	1	1	13.9274	505.556	166.262	41.6086	0.0346057
10181	20080102	-1	-1	14.9733	427.273	69.231	40.2167	1.23438
10181	20080102	-1	1	14.9733	537.879	154.577	27.4566	12.4868
10181	20080102	1	-1	14.9733	453.03	60.4695	36.1787	8.5592
10181	20080102	1	1	14.9733	480.556	63.8944	70.8245	10.2002
10183	20080517	-1	-1	14.3572	575	237.431	34.7675	16.9643
10183	20080517	-1	1	14.3572	379.762	61.3866	70.5112	8.93367
10183	20080517	1	-1	14.3572	413.333	129.291	59.8071	30.0212
10183	20080517	1	1	14.3572	415	107.569	87.378	39.1484
10183	20160107	-1	-1	21.9986	363.636	79.8673	74.1568	8.21096
10183	20160107	-1	1	21.9986	335	39.6357	76.072	18.3525
10183	20160107	1	-1	21.9986	354.167	34.9061	39.5402	34.9179
10183	20160107	1	1	21.9986	333.333	37.5534	72.1476	27.2034
10184	20070526	-1	-1	13.3798	677.273	376.996	37.0494	23.7794
10184	20070526	-1	1	13.3798	572.727	208.47	77.3179	12.0306
10184	20070526	1	-1	13.3798	514.103	193.032	79.6116	12.7998
10184	20070526	1	1	13.3798	583.333	213.437	40.6164	15.8981
10184	20120725	-1	-1	18.5462	496.667	271.12	61.7825	42.3746
10184	20120725	-1	1	18.5462	416.667	89.7527	71.7621	0.695628
10184	20120725	1	-1	18.5462	532.051	189.231	115.511	49.2657
10184	20120725	1	1	18.5462	436.667	103.28	91.9155	33.7124
10184	20130918	-1	-1	19.6961	326.667	110.05	100.596	51.3314
10184	20130918	-1	1	19.6961	513.636	200.53	108.806	12.3759
10184	20130918	1	-1	19.6961	352.381	104.566	52.5232	9.58758
10184	20130918	1	1	19.6961	441.667	128.792	53.3369	38.4274
10184	20150512	-1	-1	21.3415	395.833	126.538	25.9833	1.59316
10184	20150512	-1	1	21.3415	530.303	219.573	57.6588	26.274
10184	20150512	1	-1	21.3415	408.974	95.6497	37.0164	2.14917
10184	20150512	1	1	21.3415	398.148	128.14	51.4327	0.721679
10185	20051004	-1	-1	19.7536	433.333	156.938	78.6912	11.3035
10185	20051004	-1	1	19.7536	545.238	331.343	104.794	2.86196
10185	20051004	1	-1	19.7536	347.222	80.5651	28.3308	54.2015
10185	20051004	1	1	19.7536	475	185.517	123.64	16.2986
10185	20070426	-1	-1	21.3114	362.5	102.771	42.9154	11.4393
10185	20070426	-1	1	21.3114	420.238	101.733	38.9889	1.70688
10185	20070426	1	-1	21.3114	466.667	146.249	35.7608	3.27855
10185	20070426	1	1	21.3114	350	86.4791	27.0792	2.69418
10185	20120104	-1	-1	26.0041	353.333	40.4342	96.9735	45.1844
10185	20120104	-1	1	26.0041	342.308	43.3629	82.2602	20.1041
10185	20120104	1	-1	26.0041	343.333	91.8937	77.2074	22.1649
10185	20120104	1	1	26.0041	372.619	156.976	40.4289	2.18548
10185	20130227	-1	-1	27.154	304.167	82.9156	53.0655	4.96892
10185	20130227	-1	1	27.154	303.03	42.0437	59.4655	17.0319
10185	20130227	1	-1	27.154	361.667	82.7946	93.4124	3.945
10185	20130227	1	1	27.154	312.121	130.616	86.8275	29.5377
10185	20140416	-1	-1	28.2847	375.641	93.4462	48.8246	5.60628
10185	20140416	-1	1	28.2847	324.444	53.773	43.2533	15.3974
10185	20140416	1	-1	28.2847	389.286	91.6625	58.8832	0.543974
10185	20140416	1	1	28.2847	321.795	54.5964	57.227	7.3765
10185	20150413	-1	-1	29.2758	383.333	83.7866	44.6794	9.21907
10185	20150413	-1	1	29.2758	350	65.5204	42.9189	28.4642
10185	20150413	1	-1	29.2758	367.778	88.0716	32.7132	8.78934
10185	20150413	1	1	29.2758	346.667	71.603	33.7463	11.8588
10186	20071130	-1	-1	17.8863	446.296	133.536	42.4281	7.26519
10186	20071130	-1	1	17.8863	377.083	82.5859	111.344	5.76151
10186	20071130	1	-1	17.8863	433.333	145.456	31.9179	9.24359
10186	20071130	1	1	17.8863	356.061	63.8021	57.976	24.0875
10186	20100310	-1	-1	20.1615	390.476	110.885	75.7821	8.99948
10186	20100310	-1	1	20.1615	366.667	94.2809	51.8793	18.9542
10186	20100310	1	-1	20.1615	410.256	132.382	50.134	9.19367
10186	20100310	1	1	20.1615	322.222	57.6204	73.3889	0.35473
10187	20051215	-1	-1	15.926	436.667	93.2275	34.6194	24.1608
10187	20051215	-1	1	15.926	384.524	55.2633	89.0552	27.3261
10187	20051215	1	-1	15.926	427.778	68.2884	39.7337	14.4186
10187	20051215	1	1	15.926	451.111	223.737	88.8396	10.0237
10187	20070125	-1	-1	17.0376	466.667	82.9993	29.321	19.9236
10187	20070125	-1	1	17.0376	410.606	73.8891	81.0645	44.9613
10187	20070125	1	-1	17.0376	447.778	87.0292	55.2917	10.0301
10187	20070125	1	1	17.0376	408.333	57.0752	55.236	28.3202
10187	20080111	-1	-1	17.9986	344.444	51.0472	21.8103	15.5678
10187	20080111	-1	1	17.9986	328.889	72.5025	25.9513	10.7638
10187	20080111	1	-1	17.9986	348.889	69.427	36.804	11.5261
10187	20080111	1	1	17.9986	318.889	66.3285	36.3819	11.0175
10187	20090204	-1	-1	19.0664	441.667	67.9795	59.1315	13.3776
10187	20090204	-1	1	19.0664	421.795	44.8168	55.3619	36.4924
10187	20090204	1	-1	19.0664	477.778	129.555	67.5946	10.6254
10187	20090204	1	1	19.0664	416.667	85.485	46.4483	16.6779
10187	20100105	-1	-1	19.9835	401.282	44.3375	23.9166	9.83221
10187	20100105	-1	1	19.9835	420.238	53.9779	63.1069	0.95909
10187	20100105	1	-1	19.9835	444.048	103.074	30.9892	10.5635
10187	20100105	1	1	19.9835	378.205	65.0444	52.555	10.3394
10187	20120710	-1	-1	22.4941	372.222	65.263	37.2813	20.6936
10187	20120710	-1	1	22.4941	383.333	72.2058	39.54	30.0542
10187	20120710	1	-1	22.4941	455.128	252.339	41.3393	1.33313
10187	20120710	1	1	22.4941	355.952	59.4157	37.4056	13.5862
10187	20130801	-1	-1	23.5537	432.051	147.739	78.4916	11.9172
10187	20130801	-1	1	23.5537	327.778	72.5572	93.4926	31.9852
10187	20130801	1	-1	23.5537	388.889	71.5391	56.0144	7.57145
10187	20130801	1	1	23.5537	364.103	76.9338	63.7567	55.7741
10187	20140911	-1	-1	24.6653	370.238	58.8997	29.4144	6.0034
10187	20140911	-1	1	24.6653	374.242	35.248	42.3026	6.40031
10187	20140911	1	-1	24.6653	378.571	68.0713	46.4842	6.21514
10187	20140911	1	1	24.6653	371.111	45.1921	75.5052	9.89808
10187	20150812	-1	-1	25.5824	317.857	74.6686	32.7202	18.9776
10187	20150812	-1	1	25.5824	332.222	86.7094	38.8643	7.31568
10187	20150812	1	-1	25.5824	315.556	61.8712	38.6999	12.5933
10187	20150812	1	1	25.5824	332.222	61.8712	35.6677	23.72
10188	20051214	-1	-1	17.9384	442.857	231.837	40.0379	8.4545
10188	20051214	-1	1	17.9384	411.905	76.0759	34.7013	5.31547
10188	20051214	1	-1	17.9384	537.179	260.533	38.0821	28.4988
10188	20051214	1	1	17.9384	419.231	102.254	45.2601	38.1114
10188	20071017	-1	-1	19.7782	487.179	117.093	48.4709	25.7538
10188	20071017	-1	1	19.7782	406.25	110.172	34.3378	4.21856
10188	20071017	1	-1	19.7782	469.231	86.0249	61.6456	12.0807
10188	20071017	1	1	19.7782	370	95.1931	61.9676	31.012
10188	20090115	-1	-1	21.0267	427.778	109.252	46.7679	8.03896
10188	20090115	-1	1	21.0267	398.485	33.71	85.7537	23.8971
10188	20090115	1	-1	21.0267	484.444	97.4815	48.9759	4.13704
10188	20090115	1	1	21.0267	421.429	92.3179	42.9749	14.8288
10188	20091015	-1	-1	21.7741	442.308	131.166	43.6525	13.1711
10188	20091015	-1	1	21.7741	483.333	201.958	42.771	13.9095
10188	20091015	1	-1	21.7741	448.889	82.2469	38.74	6.68139
10188	20091015	1	1	21.7741	411.905	60.7744	79.7914	0.73389
10189	20070607	-1	-1	22.4038	537.879	169.491	31.6348	2.1553
10189	20070607	-1	1	22.4038	435.897	116.636	60.8974	0.235597
10189	20070607	1	-1	22.4038	595.556	194.004	27.3833	4.26401
10189	20070607	1	1	22.4038	455.556	95.1695	50.1416	10.4597
10192	20051222	-1	-1	15.9452	622.222	263.076	58.8071	14.724
10192	20051222	-1	1	15.9452	450	124.316	51.4254	18.9428
10192	20051222	1	-1	15.9452	665.476	251.87	52.733	35.5039
10192	20051222	1	1	15.9452	455.128	170.292	63.3894	38.9159
10192	20070127	-1	-1	17.0431	419.444	111.199	61.8297	10.2872
10192	20070127	-1	1	17.0431	385.556	70.1095	51.6555	23.6
10192	20070127	1	-1	17.0431	413.095	86.7698	52.1317	10.6732
10192	20070127	1	1	17.0431	434.524	100.949	35.4459	29.8589
10192	20080119	-1	-1	18.0205	501.852	170.262	37.9631	22.5467
10192	20080119	-1	1	18.0205	438.889	118.732	34.6934	38.9886
10192	20080119	1	-1	18.0205	561.667	125.228	30.3477	21.5422
10192	20080119	1	1	18.0205	518.75	164.856	27.4003	23.3858
10192	20090314	-1	-1	19.1704	465.278	118.377	61.9568	40.5882
10192	20090314	-1	1	19.1704	421.795	90.3657	70.6146	23.9326
10192	20090314	1	-1	19.1704	527.381	137.376	47.3422	19.1605
10192	20090314	1	1	19.1704	435.897	66.2648	50.4971	30.9073
10192	20100112	-1	-1	20.0027	477.778	104.083	44.8053	4.25443
10192	20100112	-1	1	20.0027	408.333	67.607	46.6857	22.884
10192	20100112	1	-1	20.0027	494.444	88.0006	45.0216	29.7478
10192	20100112	1	1	20.0027	481.818	119.827	44.1306	29.6015
10192	20120725	-1	-1	22.5352	393.056	60.075	36.4729	5.97162
10192	20120725	-1	1	22.5352	416.667	69.6311	39.109	24.9309
10192	20120725	1	-1	22.5352	602.381	135.693	38.924	18.655
10192	20120725	1	1	22.5352	523.077	161.81	32.5237	6.54699
10192	20130507	-1	-1	23.3182	378.205	126.268	29.2271	0.522468
10192	20130507	-1	1	23.3182	390.476	85.1631	31.8649	3.35794
10192	20130507	1	-1	23.3182	400	110.763	24.2857	21.8063
10192	20130507	1	1	23.3182	361.905	138.433	53.995	9.98328
10192	20140501	-1	-1	24.3011	448.81	92.0944	55.6933	28.2619
10192	20140501	-1	1	24.3011	388.889	83.5855	57.2045	32.7347
10192	20140501	1	-1	24.3011	455.128	94.3753	40.6151	22.0468
10192	20140501	1	1	24.3011	377.778	104.043	31.5028	19.7677
10192	20150511	-1	-1	25.3278	372.619	70.2885	33.3514	10.6506
10192	20150511	-1	1	25.3278	405.952	151.433	33.5573	16.868
10192	20150511	1	-1	25.3278	455.952	123.449	34.0675	17.4793
10192	20150511	1	1	25.3278	384.722	124.815	41.4244	2.17792
10193	20060204	-1	-1	14.089	423.333	36.1752	86.4064	44.8581
10193	20060204	-1	1	14.089	418.182	36.859	75.7096	15.4105
10193	20060204	1	-1	14.089	448.889	79.798	47.5979	33.8236
10193	20060204	1	1	14.089	525.641	140.207	57.4801	19.3317
10193	20071208	-1	-1	15.9288	418.333	97.642	48.9249	27.7716
10193	20071208	-1	1	15.9288	356.667	90.6765	47.8437	25.2636
10193	20071208	1	-1	15.9288	504.167	246.606	42.1141	9.63466
10193	20071208	1	1	15.9288	346.667	93.2275	36.2298	7.6366
10193	20090411	-1	-1	17.2703	445.556	140.502	56.3515	17.2654
10193	20090411	-1	1	17.2703	411.538	72.452	40.4913	1.95336
10193	20090411	1	-1	17.2703	435.714	136.791	43.5025	4.28009
10193	20090411	1	1	17.2703	495.833	137.46	55.0344	17.9911
10193	20100116	-1	-1	18.0369	400	53.9072	59.3239	14.0459
10193	20100116	-1	1	18.0369	408.333	39.6297	51.4349	13.6476
10193	20100116	1	-1	18.0369	429.762	95.2232	61.941	27.2325
10193	20100116	1	1	18.0369	402.564	80.7506	31.8484	2.53677
10194	20070124	-1	-1	19.0581	476.19	286.425	114.615	8.26497
10194	20070124	-1	1	19.0581	383.333	68.5628	93.6756	4.21167
10194	20070124	1	-1	19.0581	354.762	89.2582	50.3451	9.25363
10194	20070124	1	1	19.0581	411.538	181.351	77.8595	10.7044
10194	20071208	-1	-1	19.9288	439.744	122.953	52.0543	14.2589
10194	20071208	-1	1	19.9288	433.333	196.047	66.4054	1.63016
10194	20071208	1	-1	19.9288	463.889	160.308	45.8234	8.72097
10194	20071208	1	1	19.9288	418.519	68.4371	72.6281	27.1345
10195	20151216	-1	-1	21.9521	572.222	282.843	16.2054	3.43423
10195	20151216	-1	1	21.9521	404.167	68.9477	39.1495	5.4412
10195	20151216	1	-1	21.9521	466.667	136.657	43.1075	14.2579
10195	20151216	1	1	21.9521	456.667	249.469	75.8333	22.2703
10199	20130612	-1	-1	21.4456	384.444	115.55	63.6264	5.76323
10199	20130612	-1	1	21.4456	393.59	96.114	62.8281	7.15431
10199	20130612	1	-1	21.4456	403.03	96.5569	52.9846	10.3749
10199	20130612	1	1	21.4456	365.556	94.7986	57.0903	11.8398
10199	20140709	-1	-1	22.5188	407.143	92.615	65.2693	23.7665
10199	20140709	-1	1	22.5188	467.857	124.287	85.768	0.0231454
10199	20140709	1	-1	22.5188	411.111	105.535	65.3733	24.6356
10199	20140709	1	1	22.5188	423.81	104.127	64.0651	16.7076
10201	20060126	-1	-1	11.0581	541.667	153.609	38.4482	2.984
10201	20060126	-1	1	11.0581	456.061	167.377	72.8041	10.5694
10201	20060126	1	-1	11.0581	533.333	212.263	90.4869	9.32877
10201	20060126	1	1	11.0581	544.444	182.574	109.163	32.2381
10201	20061209	-1	-1	11.926	586.111	166.338	61.7361	3.05324
10201	20061209	-1	1	11.926	544.444	184.82	74.2522	28.2312
10201	20061209	1	-1	11.926	516.667	83.205	51.9828	8.71791
10201	20061209	1	1	11.926	398.333	55.805	56.658	18.2699
10201	20071103	-1	-1	12.8268	561.905	166.593	36.7813	12.4524
10201	20071103	-1	1	12.8268	437.5	101.286	41.5248	28.0192
10201	20071103	1	-1	12.8268	493.333	130.597	32.2281	7.46087
10201	20071103	1	1	12.8268	473.81	159.956	52.6829	22.424
10202	20060123	-1	-1	17.0431	443.939	195.828	65.6446	3.46929
10202	20060123	-1	1	17.0431	441.667	103.517	62.1174	6.77968
10202	20060123	1	-1	17.0431	429.762	174.701	48.0765	5.63432
10202	20060123	1	1	17.0431	382.051	61.4115	46.8435	12.7615
10202	20061118	-1	-1	17.8617	371.111	108.83	41.0505	17.518
10202	20061118	-1	1	17.8617	376.923	64.384	41.9086	4.2238
10202	20061118	1	-1	17.8617	385.556	145.142	40.3294	14.4504
10202	20061118	1	1	17.8617	332.222	51.7421	43.6658	7.94221
10202	20071218	-1	-1	18.9431	344.048	68.4402	47.697	21.4276
10202	20071218	-1	1	18.9431	384.722	50.4817	72.615	41.8462
10202	20071218	1	-1	18.9431	374.444	121.966	46.49	22.7119
10202	20071218	1	1	18.9431	394.872	57.889	51.6863	13.5041
10202	20090109	-1	-1	20.0054	363.636	83.2727	27.9609	4.18091
10202	20090109	-1	1	20.0054	361.111	49.4073	60.9757	7.28349
10202	20090109	1	-1	20.0054	320.513	44.6975	58.6115	9.30455
10202	20090109	1	1	20.0054	355.128	44.8168	64.3928	20.5526
10202	20100112	-1	-1	21.013	346.429	105.648	43.7995	5.59418
10202	20100112	-1	1	21.013	344.444	41.0305	48.009	28.3648
10202	20100112	1	-1	21.013	314.103	28.7439	45.0387	9.64867
10202	20100112	1	1	21.013	334.848	57.472	47.2763	7.90307
10202	20160112	-1	-1	27.0116	312.5	125.956	51.0078	1.76237
10202	20160112	-1	1	27.0116	357.143	54.1896	65.8262	40.0863
10202	20160112	1	-1	27.0116	340.909	87.991	28.6631	1.28072
10202	20160112	1	1	27.0116	377.778	61.2372	43.1593	22.694
10204	20060105	-1	-1	19.9835	412.5	68.2113	48.5523	1.49279
10204	20060105	-1	1	19.9835	313.636	31.4627	40.5424	5.60557
10204	20060105	1	-1	19.9835	444.444	85.8355	61.8821	0.592294
10204	20060105	1	1	19.9835	348.611	47.3853	23.1033	1.26017
10204	20070110	-1	-1	20.9965	365.278	64.5334	46.9575	15.4252
10204	20070110	-1	1	20.9965	369.231	61.1791	41.0191	2.75616
10204	20070110	1	-1	20.9965	420	76.9457	45.2489	1.8875
10204	20070110	1	1	20.9965	362.5	51.7985	48.5345	0.547991
10206	20060119	-1	-1	18.037	520	282.93	86.6349	54.4817
10206	20060119	-1	1	18.037	398.485	135.289	103.621	3.29266
10206	20060119	1	-1	18.037	479.762	181.303	83.0916	21.9543
10206	20060119	1	1	18.037	373.611	98.8465	128.544	1.22014
10206	20070106	-1	-1	19.0007	391.667	168.25	35.0103	17.7954
10206	20070106	-1	1	19.0007	341.667	48.4612	33.8927	12.2084
10206	20070106	1	-1	19.0007	467.778	178.449	49.4599	0.338796
10206	20070106	1	1	19.0007	463.889	293.347	27.3707	6.27674
10215	20080126	-1	-1	16.0602	466.667	87.7971	61.0526	15.949
10215	20080126	-1	1	16.0602	428.788	195.518	59.4851	8.57854
10215	20080126	1	-1	16.0602	521.795	193.815	85.2196	5.58852
10215	20080126	1	1	16.0602	423.611	117.305	120.134	14.7676
10218	20151215	-1	-1	18.9349	527.083	247.197	57.4931	8.90318
10218	20151215	-1	1	18.9349	456.061	218.489	90.7217	24.2952
10218	20151215	1	-1	18.9349	560.256	162.238	60.9548	11.5337
10218	20151215	1	1	18.9349	445.833	198.368	107.839	26.6208
10221	20071129	-1	-1	14.8802	542.424	219.515	80.8303	7.95324
10221	20071129	-1	1	14.8802	408.333	88.0484	52.2944	10.5427
10221	20071129	1	-1	14.8802	491.026	193.124	66.6029	21.6407
10221	20071129	1	1	14.8802	354.762	51.2362	47.8953	4.63569
10221	20081124	-1	-1	15.8686	478.788	170.635	44.9204	6.1905
10221	20081124	-1	1	15.8686	420.37	73.4931	63.1104	36.208
10221	20081124	1	-1	15.8686	551.111	262.2	47.3717	24.4022
10221	20081124	1	1	15.8686	390.741	73.1774	55.4645	6.02483
10221	20100123	-1	-1	17.0322	586.905	227.226	52.0894	13.0566
10221	20100123	-1	1	17.0322	447.436	113.62	56.2402	5.33175
10221	20100123	1	-1	17.0322	474.359	139.047	41.4216	0.218077
10221	20100123	1	1	17.0322	425.556	85.1858	40.8323	7.72921
10222	20060311	-1	-1	17.1718	535.714	311.72	50.9691	21.6396
10222	20060311	-1	1	17.1718	561.111	311.567	65.9025	14.2372
10222	20060311	1	-1	17.1718	627.778	244.381	54.5715	25.557
10222	20060311	1	1	17.1718	520	375.352	119.808	2.26259
10223	20100402	-1	-1	14.2203	605.556	254.678	105.458	1.51631
10223	20100402	-1	1	14.2203	504.167	154.09	59.8108	31.3191
10223	20100402	1	-1	14.2203	551.852	306.577	90.7948	9.07402
10223	20100402	1	1	14.2203	379.63	125.769	113.058	27.0396
10226	20051208	-1	-1	8.91987	570	285.644	98.9987	45.8525
10226	20051208	-1	1	8.91987	427.778	139.443	50.5589	15.7828
10226	20051208	1	-1	8.91987	562.121	266.676	87.9009	30.0773
10226	20051208	1	1	8.91987	604.545	272.345	125.658	2.06445
10226	20070614	-1	-1	10.4339	513.333	178.308	78.0088	5.79928
10226	20070614	-1	1	10.4339	384.444	71.121	44.8498	2.8256
10226	20070614	1	-1	10.4339	492.857	167.78	90.7327	0.311703
10226	20070614	1	1	10.4339	356.061	32.7217	83.3914	15.722
10226	20100505	-1	-1	13.3251	720.833	230.297	54.4082	3.22041
10226	20100505	-1	1	13.3251	493.333	102.198	47.1991	22.646
10226	20100505	1	-1	13.3251	605.556	118.732	99.0496	89.9713
10226	20100505	1	1	13.3251	431.944	94.4036	59.6528	11.6153
10232	20070120	-1	-1	11.0499	525	221.283	72.2647	26.2956
10232	20070120	-1	1	11.0499	616.667	234.69	83.7929	6.70662
10232	20070120	1	-1	11.0499	536.667	212.539	56.4746	7.96195
10232	20070120	1	1	11.0499	595.833	210.017	46.1028	12.7783
10233	20080223	-1	-1	18.1437	462.821	93.8265	79.6489	10.8534
10233	20080223	-1	1	18.1437	368.056	116.441	95.6792	30.543
10233	20080223	1	-1	18.1437	494.444	241.091	90.6188	0.758253
10233	20080223	1	1	18.1437	425.758	177.069	116.192	22.1305
10241	20060515	-1	-1	15.3456	576.667	262.255	57.2219	21.4168
10241	20060515	-1	1	15.3456	428.571	80.9739	54.0879	15.9936
10241	20060515	1	-1	15.3456	607.778	207.868	37.903	9.95816
10241	20060515	1	1	15.3456	495.833	139.466	52.7989	25.9559
10241	20080327	-1	-1	17.2128	400	42.6401	41.4289	15.0764
10241	20080327	-1	1	17.2128	426.667	35.3117	56.5846	32.5088
10241	20080327	1	-1	17.2128	505.128	140.499	33.4378	5.88902
10241	20080327	1	1	17.2128	466.667	60.7196	46.2469	5.95087
10241	20100405	-1	-1	19.2361	616.667	304.797	46.9529	1.90256
10241	20100405	-1	1	19.2361	519.444	136.114	72.9135	4.06014
10241	20100405	1	-1	19.2361	527.778	186.587	45.642	12.8582
10241	20100405	1	1	19.2361	451.667	133.899	125.911	37.6295
10241	20111220	-1	-1	20.9445	495.238	67.4406	85.0714	25.245
10241	20111220	-1	1	20.9445	515.278	96.5198	72.5892	11.061
10241	20111220	1	-1	20.9445	485.714	164.844	70.8932	5.30089
10241	20111220	1	1	20.9445	577.381	152.277	51.545	13.6236
10241	20121218	-1	-1	21.9411	504.545	66.2868	36.5528	14.8454
10241	20121218	-1	1	21.9411	526.923	99.1955	45.0803	11.5226
10241	20121218	1	-1	21.9411	532.143	157.635	34.8946	12.4989
10241	20121218	1	1	21.9411	510.256	107.484	52.1506	1.67385
10241	20140109	-1	-1	23.0006	575.641	211.434	74.9154	13.8635
10241	20140109	-1	1	23.0006	488.889	58.9256	116.443	25.5969
10241	20140109	1	-1	23.0006	525	162.589	49.9243	10.9009
10241	20140109	1	1	23.0006	491.026	80.6844	72.7613	18.6186
10241	20141013	-1	-1	23.759	454.545	82.6945	39.0549	12.6846
10241	20141013	-1	1	23.759	555.556	81.7527	31.688	0.779567
10241	20141013	1	-1	23.759	492.222	104.248	52.4222	14.163
10241	20141013	1	1	23.759	498.611	82.7123	48.1926	22.0496
10248	20090318	-1	-1	19.1978	538.462	171.915	125.705	5.41508
10248	20090318	-1	1	19.1978	419.231	201.481	66.3483	49.0986
10248	20090318	1	-1	19.1978	498.718	184.147	77.287	27.4007
10248	20090318	1	1	19.1978	410.256	142.974	84.2894	10.5713
10248	20120925	-1	-1	22.7214	528.788	196.227	48.7645	12.585
10248	20120925	-1	1	22.7214	389.744	211.316	52.542	16.8079
10248	20120925	1	-1	22.7214	425	141.836	51.8653	3.1297
10248	20120925	1	1	22.7214	388.462	171.781	46.2658	3.46989
10248	20130808	-1	-1	23.5893	400	147.051	52.0213	3.22477
10248	20130808	-1	1	23.5893	356.667	83.0471	57.0644	12.9774
10248	20130808	1	-1	23.5893	587.5	241.745	68.7292	1.70044
10248	20130808	1	1	23.5893	361.538	135.978	37.8952	20.332
10248	20141022	-1	-1	24.7939	480.769	182.301	99.3466	4.0771
10248	20141022	-1	1	24.7939	357.143	152.573	41.7411	6.91113
10248	20141022	1	-1	24.7939	525.641	188.637	46.1917	14.7791
10248	20141022	1	1	24.7939	352.381	99.5411	48.3691	21.3267
10248	20150611	-1	-1	25.4291	437.037	156.963	64.1598	29.7231
10248	20150611	-1	1	25.4291	345.455	106.221	108.368	1.74475
10248	20150611	1	-1	25.4291	466.667	148.353	120.116	27.2487
10248	20150611	1	1	25.4291	441.667	230.572	120.903	11.042
10252	20090513	-1	-1	15.3402	577.083	338.172	63.7892	52.5153
10252	20090513	-1	1	15.3402	411.111	164.992	59.0846	3.14893
10252	20090513	1	-1	15.3402	545	286.642	115.126	25.6902
10252	20090513	1	1	15.3402	497.222	169.943	80.9295	19.3267
10253	20120710	-1	-1	19.5181	566.667	264.766	96.1422	28.2456
10253	20120710	-1	1	19.5181	457.692	197.392	57.6069	4.77568
10253	20120710	1	-1	19.5181	574.074	130.998	67.927	23.9991
10253	20120710	1	1	19.5181	446.97	144.687	37.3095	6.25494
10256	20080625	-1	-1	14.4586	587.5	193.731	93.5183	30.5231
10256	20080625	-1	1	14.4586	450	85.9835	43.9202	15.539
10256	20080625	1	-1	14.4586	584.524	158.716	44.9638	8.14663
10256	20080625	1	1	14.4586	451.111	206.873	87.3179	9.82983
10256	20100512	-1	-1	16.3367	427.778	92.2046	22.8044	8.45187
10256	20100512	-1	1	16.3367	423.611	68.3346	26.5928	7.28583
10256	20100512	1	-1	16.3367	502.778	166.641	32.8448	9.60276
10256	20100512	1	1	16.3367	461.111	62.361	27.1193	13.1117
10260	20070707	-1	-1	17.4976	497.436	137.074	67.7628	17.1663
10260	20070707	-1	1	17.4976	460.256	111.915	102.558	10.1833
10260	20070707	1	-1	17.4976	657.576	272.373	51.7172	9.83739
10260	20070707	1	1	17.4976	530	243.787	179.699	32.2088
10261	20060417	-1	-1	18.2669	544.444	221.944	52.1942	8.23722
10261	20060417	-1	1	18.2669	435.556	208.154	47.0375	4.75026
10261	20060417	1	-1	18.2669	578.571	258.482	53.4401	1.84393
10261	20060417	1	1	18.2669	392.222	123.903	46.7506	9.77621
10263	20060826	-1	-1	20.6351	469.697	221.587	56.0821	26.2527
10263	20060826	-1	1	20.6351	483.333	201.996	60.3711	10.6336
10263	20060826	1	-1	20.6351	452.381	52.2003	53.871	17.9241
10263	20060826	1	1	20.6351	481.944	128.993	24.5816	14.4248
10263	20070924	-1	-1	21.7138	416.667	65.0854	20.2274	15.096
10263	20070924	-1	1	21.7138	379.63	40.6354	39.5002	5.95406
10263	20070924	1	-1	21.7138	522.222	141.123	42.547	4.54168
10263	20070924	1	1	21.7138	459.259	122.222	35.7316	0.85576
10268	20060401	-1	-1	15.2252	327.778	61.6141	46.4517	21.2445
10268	20060401	-1	1	15.2252	313.333	53.5264	43.899	0.868246
10268	20060401	1	-1	15.2252	460.714	268.79	53.2542	9.07625
10268	20060401	1	1	15.2252	330	93.9013	35.8611	21.0219
10268	20070120	-1	-1	16.0301	395.833	64.4029	22.5951	27.7927
10268	20070120	-1	1	16.0301	342.308	58.7743	77.2658	24.667
10268	20070120	1	-1	16.0301	395.238	44.0612	52.8278	11.3257
10268	20070120	1	1	16.0301	397.619	152.312	45.1176	6.89826
10275	20060415	-1	-1	9.27306	427.083	117.493	81.5897	112.26
10275	20060415	-1	1	9.27306	390.476	102.224	41.7516	48.5831
10275	20060415	1	-1	9.27306	469.444	210.679	157.345	0.242742
10275	20060415	1	1	9.27306	616.667	270.288	108.429	62.6872
10275	20070623	-1	-1	10.4613	535.417	249.672	49.1349	8.62565
10275	20070623	-1	1	10.4613	581.818	266.714	58.3951	30.8625
10275	20070623	1	-1	10.4613	637.5	307.802	35.6575	8.96519
10275	20070623	1	1	10.4613	693.333	395.203	54.6119	13.9918
10279	20130112	-1	-1	30.0205	490.278	181.945	44.0645	21.8853
10279	20130112	-1	1	30.0205	338.889	70.1129	55.9165	5.00546
10279	20130112	1	-1	30.0205	408.889	100.764	27.1443	3.154
10279	20130112	1	1	30.0205	370.833	69.6764	32.4721	9.75099
10279	20140118	-1	-1	31.0363	425.641	179.327	30.1689	0.420045
10279	20140118	-1	1	31.0363	333.333	43.5677	29.861	12.5455
10279	20140118	1	-1	31.0363	471.111	254.676	29.9598	0.494975
10279	20140118	1	1	31.0363	316.667	25.6235	25.3169	0.699145
10279	20150207	-1	-1	32.0903	386.364	110.76	51.6081	18.2879
10279	20150207	-1	1	32.0903	393.59	214.037	96.3246	27.38
10279	20150207	1	-1	32.0903	319.444	110.516	65.7361	17.9785
10279	20150207	1	1	32.0903	344.444	65.6167	88.9777	24.2856
10282	20060508	-1	-1	18.3381	550	250.333	55.1461	13.3054
10282	20060508	-1	1	18.3381	427.778	129.904	58.6573	26.9075
10282	20060508	1	-1	18.3381	696.667	211.666	24.1979	9.04447
10282	20060508	1	1	18.3381	450	273.861	61.6711	3.40453
10288	20060720	-1	-1	17.5332	438.462	107.666	81.3347	39.4796
10288	20060720	-1	1	17.5332	381.818	50.8017	55.1284	5.05758
10288	20060720	1	-1	17.5332	484.524	158.985	82.9118	26.1234
10288	20060720	1	1	17.5332	428.788	69.5585	42.062	15.4394
10288	20070411	-1	-1	18.2587	359.259	52.1157	73.9446	7.41701
10288	20070411	-1	1	18.2587	424.242	93.5009	84.7137	5.49705
10288	20070411	1	-1	18.2587	445	226.902	90.9703	36.1914
10288	20070411	1	1	18.2587	405.556	81.6497	91.37	12.7303
10288	20090715	-1	-1	20.5202	368.333	28.814	45.9116	28.5211
10288	20090715	-1	1	20.5202	412.5	72.1688	55.6733	22.3097
10288	20090715	1	-1	20.5202	406.944	63.746	51.1763	16.1576
10288	20090715	1	1	20.5202	381.818	42.4621	74.8321	21.2459
10288	20100518	-1	-1	21.3607	397.222	144.221	87.9465	58.2985
10288	20100518	-1	1	21.3607	412.5	53.7131	82.2523	31.9609
10288	20100518	1	-1	21.3607	423.077	139.034	81.6053	45.2414
10288	20100518	1	1	21.3607	402.778	101.711	42.0372	33.6269
10300	20090617	-1	-1	14.4339	533.333	139.222	142.567	16.0914
10300	20090617	-1	1	14.4339	607.143	311.03	101.548	4.75155
10300	20090617	1	-1	14.4339	564.444	172.04	129.69	10.8671
10300	20090617	1	1	14.4339	555.128	204.96	137.107	17.1467
10300	20100616	-1	-1	15.4305	583.333	228.632	99.391	7.02342
10300	20100616	-1	1	15.4305	526.389	177.021	69.8862	6.65963
10300	20100616	1	-1	15.4305	480.769	132.785	94.4516	12.5478
10300	20100616	1	1	15.4305	570.833	156.69	105.219	26.9358
10311	20070517	-1	-1	21.3661	422.222	153.433	44.7457	22.5374
10311	20070517	-1	1	21.3661	478.333	267.135	79.2479	41.8127
10311	20070517	1	-1	21.3661	534.848	242.608	38.3431	13.4509
10311	20070517	1	1	21.3661	403.704	163.252	45.6527	2.25047
10311	20080514	-1	-1	22.36	394.048	125.509	43.097	25.0035
10311	20080514	-1	1	22.36	348.889	62.8259	39.5269	2.68396
10311	20080514	1	-1	22.36	383.333	198.106	44.6522	2.90324
10311	20080514	1	1	22.36	368.889	45.3674	52.0586	0.672809
10311	20090420	-1	-1	23.2936	422.222	96.1047	77.2633	56.0824
10311	20090420	-1	1	23.2936	425	121.543	117.513	24.5569
10311	20090420	1	-1	23.2936	497.436	219.622	134.459	18.6094
10311	20090420	1	1	23.2936	461.111	211.337	53.6536	5.34484
10311	20100908	-1	-1	24.6789	395.455	81.6806	35.5642	33.1017
10311	20100908	-1	1	24.6789	395.833	42.7141	43.6246	27.9808
10311	20100908	1	-1	24.6789	395.238	55.6349	46.3856	1.78169
10311	20100908	1	1	24.6789	403.03	52.6087	48.0953	17.3987
10311	20130819	-1	-1	27.6249	340.909	31.9406	45.8396	26.1959
10311	20130819	-1	1	27.6249	372.727	58.3442	77.2239	4.92962
10311	20130819	1	-1	27.6249	459.524	267.763	73.6638	28.839
10311	20130819	1	1	27.6249	409.091	212.964	85.9662	26.3701
10311	20150120	-1	-1	29.0458	342.308	45.9546	50.7201	15.2935
10311	20150120	-1	1	29.0458	416.667	158.654	33.9562	7.36838
10311	20150120	1	-1	29.0458	367.778	90.0764	58.7977	20.4621
10311	20150120	1	1	29.0458	397.619	62.654	49.6386	8.97882
10311	20160411	-1	-1	30.2696	320.513	39.7643	39.5569	12.0752
10311	20160411	-1	1	30.2696	419.231	78.7184	32.7137	16.1253
10311	20160411	1	-1	30.2696	351.111	81.2762	24.9152	3.00778
10311	20160411	1	1	30.2696	391.667	160.495	38.7015	5.36047
10315	20070705	-1	-1	19.488	391.667	69.8122	35.6409	6.90356
10315	20070705	-1	1	19.488	331.944	34.4204	47.9606	28.8381
10315	20070705	1	-1	19.488	397.619	70.6675	31.3817	0.524714
10315	20070705	1	1	19.488	375	82.7251	32.4907	3.83142
10315	20080728	-1	-1	20.553	466.667	196.047	94.6141	57.0321
10315	20080728	-1	1	20.553	440.909	156.589	53.3946	21.026
10315	20080728	1	-1	20.553	395.833	76.5826	70.395	17.8042
10315	20080728	1	1	20.553	433.333	128.74	131.781	28.827
10315	20090604	-1	-1	21.4045	375	112.01	53.9054	3.31322
10315	20090604	-1	1	21.4045	368.333	97.642	45.6564	2.73166
10315	20090604	1	-1	21.4045	421.667	72.4569	52.575	11.2715
10315	20090604	1	1	21.4045	406.25	158.849	69.2529	10.9796
10315	20110119	-1	-1	23.0308	424.242	156.234	56.0507	15.4202
10315	20110119	-1	1	23.0308	553.333	346.392	81.1006	48.1117
10315	20110119	1	-1	23.0308	454.167	148.243	82.9085	2.62427
10315	20110119	1	1	23.0308	477.083	287.012	52.1982	14.0693
10316	20070503	-1	-1	21.3087	472.619	139.689	37.7658	15.5761
10316	20070503	-1	1	21.3087	446.154	200.48	54.0271	0.194142
10316	20070503	1	-1	21.3087	558.333	299.483	38.565	12.7313
10316	20070503	1	1	21.3087	424.444	101.157	59.0752	27.9589
10316	20080605	-1	-1	22.4011	465.385	157.301	61.4646	43.04
10316	20080605	-1	1	22.4011	392.857	62.6052	73.9231	52.1685
10316	20080605	1	-1	22.4011	421.111	101.275	72.5567	22.1127
10316	20080605	1	1	22.4011	435.556	159.223	52.0731	9.06877
10316	20090514	-1	-1	23.3401	503.846	285.543	43.6732	14.8303
10316	20090514	-1	1	23.3401	370	56.7646	36.8019	22.6175
10316	20090514	1	-1	23.3401	434.444	122.063	64.1068	6.63501
10316	20090514	1	1	23.3401	390	100.357	43.4856	15.9025
10316	20100614	-1	-1	24.4243	523.077	223.973	71.7951	29.0652
10316	20100614	-1	1	24.4243	453.571	120.039	73.7606	12.4935
10316	20100614	1	-1	24.4243	505.952	165.716	42.808	27.0507
10316	20100614	1	1	24.4243	501.111	191.326	66.8666	14.7823
10316	20120711	-1	-1	26.4996	423.077	116.773	52.6645	11.5582
10316	20120711	-1	1	26.4996	437.5	84.7233	49.9513	3.45565
10316	20120711	1	-1	26.4996	452.564	127.991	52.0461	13.5753
10316	20120711	1	1	26.4996	433.333	108.582	60.683	10.1825
10316	20130730	-1	-1	27.551	490.476	220.209	45.2649	1.4757
10316	20130730	-1	1	27.551	415.476	114.814	52.8718	16.9529
10316	20130730	1	-1	27.551	507.778	147.447	42.6638	11.2443
10316	20130730	1	1	27.551	425.641	55.5342	38.8065	18.8896
10316	20140506	-1	-1	28.3176	371.795	53.3093	87.7562	2.5468
10316	20140506	-1	1	28.3176	425	97.1275	45.5148	32.3968
10316	20140506	1	-1	28.3176	482.143	165.052	44.6298	19.3278
10316	20140506	1	1	28.3176	456.41	98.2576	69.5109	25.3619
10323	20060713	-1	-1	26.5215	516.667	205.896	50.8967	6.94259
10323	20060713	-1	1	26.5215	443.333	75.2773	52.0398	31.7747
10323	20060713	1	-1	26.5215	630	214.013	40.3734	15.5102
10323	20060713	1	1	26.5215	435	80.2965	58.2523	3.26464
10329	20070703	-1	-1	17.4894	500	76.8706	79.0032	20.534
10329	20070703	-1	1	17.4894	373.81	141.076	91.2023	16.5281
10329	20070703	1	-1	17.4894	462.821	100.727	65.8756	12.0161
10329	20070703	1	1	17.4894	481.944	194.814	69.4675	8.2847
10329	20081112	-1	-1	18.8528	442.857	83.1316	39.6461	10.3114
10329	20081112	-1	1	18.8528	366.667	77.0725	52.9151	13.9428
10329	20081112	1	-1	18.8528	447.778	103.292	50.767	3.71598
10329	20081112	1	1	18.8528	389.394	39.6321	93.6953	10.1719
10329	20121015	-1	-1	22.7762	344.444	115.068	28.2606	4.12031
10329	20121015	-1	1	22.7762	273.81	43.7135	29.926	4.57309
10329	20121015	1	-1	22.7762	361.111	106.205	43.3726	5.75225
10329	20121015	1	1	22.7762	288.095	48.6697	25.041	6.79119
10329	20130904	-1	-1	23.6632	374.359	79.5285	39.4165	2.99331
10329	20130904	-1	1	23.6632	340	50.3165	46.3801	7.31114
10329	20130904	1	-1	23.6632	372.222	82.2951	30.923	3.31576
10329	20130904	1	1	23.6632	342.222	49.1461	28.4777	3.03405
10333	20060729	-1	-1	19.5647	594.872	156.404	69.7567	16.2815
10333	20060729	-1	1	19.5647	405.952	78.3394	33.7091	6.9117
10333	20060729	1	-1	19.5647	591.667	117.26	42.6416	14.5533
10333	20060729	1	1	19.5647	423.077	88.0705	67.4638	23.4604
10333	20070714	-1	-1	20.5229	571.111	166.96	49.3131	22.1304
10333	20070714	-1	1	20.5229	364.286	60.9249	65.9378	5.08972
10333	20070714	1	-1	20.5229	556.667	146.222	59.4698	8.30231
10333	20070714	1	1	20.5229	398.81	80.9833	76.2848	7.01524
10333	20090917	-1	-1	22.7023	525	113.373	62.4178	24.5184
10333	20090917	-1	1	22.7023	396.429	41.9496	73.5991	11.4124
10333	20090917	1	-1	22.7023	513.333	110.59	56.5044	0.297909
10333	20090917	1	1	22.7023	406.41	65.8064	85.5848	28.215
10335	20081013	-1	-1	12.7638	784.615	260.205	125.903	45.716
10335	20081013	-1	1	12.7638	574.359	295.304	79.9064	52.8869
10335	20081013	1	-1	12.7638	741.026	270.341	82.9284	55.7769
10335	20081013	1	1	12.7638	620	305.99	53.4612	3.84727
10335	20090624	-1	-1	13.4592	505.556	149.304	84.7323	16.2816
10335	20090624	-1	1	13.4592	509.091	150.622	41.5815	16.6533
10335	20090624	1	-1	13.4592	554.444	232.777	106.03	24.8959
10335	20090624	1	1	13.4592	529.167	220.322	113.32	32.3829
10335	20100526	-1	-1	14.3792	524.242	238.207	94.0671	32.5701
10335	20100526	-1	1	14.3792	587.179	246.189	66.7066	11.6987
10335	20100526	1	-1	14.3792	547.619	257.607	74.9844	16.0911
10335	20100526	1	1	14.3792	439.744	168.124	108.223	3.87465
10336	20060824	-1	-1	13.6262	418.333	89.045	118.532	5.03407
10336	20060824	-1	1	13.6262	606.944	221.731	89.3283	81.2899
10336	20060824	1	-1	13.6262	524.074	209.681	120.359	34.3494
10336	20060824	1	1	13.6262	674.074	304.493	72.0501	44.101
10342	20060810	-1	-1	27.5784	526.923	254.455	84.842	2.20629
10342	20060810	-1	1	27.5784	442.424	115.317	40.1717	12.411
10342	20060810	1	-1	27.5784	651.389	266.046	66.9544	35.8757
10342	20060810	1	1	27.5784	394.444	86.6025	34.8299	25.3591
10343	20060909	-1	-1	12.679	424.074	196.34	74.7171	12.0959
10343	20060909	-1	1	12.679	338.889	87.7971	73.5278	18.9058
10343	20060909	1	-1	12.679	416.667	129.713	38.7788	40.0253
10343	20060909	1	1	12.679	374.074	79.5435	66.7054	5.71791
10343	20071018	-1	-1	13.7851	512.5	272.486	46.4865	3.84904
10343	20071018	-1	1	13.7851	397.436	76.9338	45.8414	14.112
10343	20071018	1	-1	13.7851	410	154.535	48.7043	6.29834
10343	20071018	1	1	13.7851	408.333	197.65	58.1273	3.43254
10344	20060909	-1	-1	16.679	511.667	193.896	63.2193	7.93286
10344	20060909	-1	1	16.679	434.848	122.351	75.7204	10.8555
10344	20060909	1	-1	16.679	451.389	183.19	85.0463	7.82045
10344	20060909	1	1	16.679	405.556	97.0091	82.7151	17.3435
10344	20081204	-1	-1	18.9158	781.25	352.141	91.6998	16.925
10344	20081204	-1	1	18.9158	383.333	63.8285	66.1087	25.4967
10344	20081204	1	-1	18.9158	501.667	144.754	122.479	27.2164
10344	20081204	1	1	18.9158	450	67.2593	68.2372	0.592692
10344	20090908	-1	-1	19.6769	440.741	142.671	81.0687	5.4119
10344	20090908	-1	1	19.6769	505	250.315	101.658	24.4583
10344	20090908	1	-1	19.6769	565	310.162	98.4181	9.42975
10344	20090908	1	1	19.6769	546.97	307.844	86.348	16.6168
10344	20101214	-1	-1	20.9418	431.667	78.3511	51.5228	1.09798
10344	20101214	-1	1	20.9418	411.538	117.139	59.3254	0.334315
10344	20101214	1	-1	20.9418	568.056	191.809	45.308	11.1269
10344	20101214	1	1	20.9418	410.256	68.2243	52.8146	2.04127
10344	20120717	-1	-1	22.5325	445.455	161.433	70.2681	18.0901
10344	20120717	-1	1	22.5325	377.273	148.749	76.1442	19.4735
10344	20120717	1	-1	22.5325	500	127.415	90.6018	23.4782
10344	20120717	1	1	22.5325	476.667	292.836	86.1339	2.35976
10345	20060914	-1	-1	10.683	605.128	233.867	44.0281	3.8672
10345	20060914	-1	1	10.683	402.778	167.397	62.3522	22.7313
10345	20060914	1	-1	10.683	669.444	256.613	71.9083	22.1678
10345	20060914	1	1	10.683	507.692	358.728	78.6125	9.95448
10357	20060907	-1	-1	20.6653	384.444	42.4763	29.2865	6.40203
10357	20060907	-1	1	20.6653	363.333	33.4522	23.7924	9.04095
10357	20060907	1	-1	20.6653	428.571	76.3563	17.961	13.9677
10357	20060907	1	1	20.6653	362.222	35.3366	33.9067	0.762754
10358	20070214	-1	-1	22.1136	441.026	104.22	65.9194	3.91286
10358	20070214	-1	1	22.1136	362.5	72.5178	69.3795	63.1251
10358	20070214	1	-1	22.1136	472.222	135.205	51.9508	22.6585
10358	20070214	1	1	22.1136	417.949	91.1505	54.7361	9.73351
10358	20070919	-1	-1	22.7077	488.462	173.923	74.0137	39.7804
10358	20070919	-1	1	22.7077	330.303	114.217	95.5363	27.405
10358	20070919	1	-1	22.7077	426.667	101.144	112.494	16.6296
10358	20070919	1	1	22.7077	348.611	45.7587	32.062	25.9937
10358	20090328	-1	-1	24.2299	540.278	278.566	35.2568	27.2551
10358	20090328	-1	1	24.2299	398.333	55.805	47.8081	1.49783
10358	20090328	1	-1	24.2299	434.444	107.73	46.3628	23.3381
10358	20090328	1	1	24.2299	373.611	31.3487	68.7865	16.5176
10358	20091207	-1	-1	24.9254	365.476	72.6378	50.6964	11.8637
10358	20091207	-1	1	24.9254	416.667	58.9256	72.5579	17.9898
10358	20091207	1	-1	24.9254	347.778	37.7264	37.5733	12.2262
10358	20091207	1	1	24.9254	465.476	255.241	83.3863	13.5086
10358	20120414	-1	-1	27.2772	363.889	85.2309	39.8135	1.96826
10358	20120414	-1	1	27.2772	410.606	54.9104	77.5561	42.0938
10358	20120414	1	-1	27.2772	396.667	74.5888	93.2169	31.539
10358	20120414	1	1	27.2772	393.056	67.2168	81.0695	3.8159
10358	20130612	-1	-1	28.438	398.333	77.5592	50.5793	15.7028
10358	20130612	-1	1	28.438	405.556	147.425	40.5398	6.27576
10358	20130612	1	-1	28.438	380.556	51.6561	48.6988	18.7236
10358	20130612	1	1	28.438	351.389	92.2388	34.1525	4.73432
10359	20061023	-1	-1	20.7939	708.333	267.854	41.8413	21.7181
10359	20061023	-1	1	20.7939	439.394	140.885	41.8862	5.65496
10359	20061023	1	-1	20.7939	697.222	292.225	42.9834	13.7726
10359	20061023	1	1	20.7939	465.152	214.405	37.1583	7.45977
10359	20070912	-1	-1	21.681	471.429	257.069	115.075	29.4154
10359	20070912	-1	1	21.681	479.167	212.646	75.3591	4.11594
10359	20070912	1	-1	21.681	439.394	171.476	40.9141	7.60513
10359	20070912	1	1	21.681	412.5	64.7032	104.824	17.4368
10359	20091217	-1	-1	23.9452	412.5	235.93	27.259	6.68579
10359	20091217	-1	1	23.9452	372.222	37.8282	60.1712	28.7566
10359	20091217	1	-1	23.9452	392.222	184.506	29.5212	13.5353
10359	20091217	1	1	23.9452	384.722	48.4395	41.8561	18.1114
10359	20121030	-1	-1	26.8145	362.821	123.819	25.6634	19.4666
10359	20121030	-1	1	26.8145	368.333	52.3816	35.9951	1.32412
10359	20121030	1	-1	26.8145	341.026	63.3243	25.4409	5.45759
10359	20121030	1	1	26.8145	468.056	247.764	45.9319	1.86014
10359	20131001	-1	-1	27.7344	314.286	73.9187	24.6368	10.196
10359	20131001	-1	1	27.7344	290.476	60.8748	83.0775	1.11232
10359	20131001	1	-1	27.7344	325	93.3127	17.1757	2.22659
10359	20131001	1	1	27.7344	307.778	87.7104	31.2403	4.56962
10359	20141013	-1	-1	28.7666	311.111	29.5875	92.7725	12.2963
10359	20141013	-1	1	28.7666	344.872	37.5059	33.7527	21.1718
10359	20141013	1	-1	28.7666	313.636	47.0332	27.6525	6.60329
10359	20141013	1	1	28.7666	378.571	75.5121	39.9292	12.7551
10359	20150511	-1	-1	29.3415	308.974	34.4369	40.8573	16.782
10359	20150511	-1	1	29.3415	345.238	77.7429	33.1011	18.8911
10359	20150511	1	-1	29.3415	359.722	74.0114	31.8447	3.73282
10359	20150511	1	1	29.3415	350	138.521	22.2644	3.32965
10360	20061111	-1	-1	8.83774	643.75	304.847	47.7159	16.5125
10360	20061111	-1	1	8.83774	675	209.828	21.4376	31.5395
10360	20061111	1	-1	8.83774	715.278	275.008	40.979	14.4215
10360	20061111	1	1	8.83774	612.821	241.058	37.3278	2.69443
10361	20061111	-1	-1	11.8412	670.833	240.068	59.6722	13.9807
10361	20061111	-1	1	11.8412	584.848	127.247	42.2098	10.6817
10361	20061111	1	-1	11.8412	670.513	161.037	25.6692	6.11153
10361	20061111	1	1	11.8412	569.444	273.938	45.0284	0.699264
10368	20071217	-1	-1	17.9329	595	184.433	73.0097	1.42875
10368	20071217	-1	1	17.9329	453.571	145.617	66.9147	11.3381
10368	20071217	1	-1	17.9329	559.524	218.064	44.7091	9.84516
10368	20071217	1	1	17.9329	458.974	135.847	51.1221	23.4162
10368	20081120	-1	-1	18.861	505.556	140.226	45.0508	8.49105
10368	20081120	-1	1	18.861	431.111	51.1249	75.5147	0.586864
10368	20081120	1	-1	18.861	497.619	139.115	67.4252	1.7855
10368	20081120	1	1	18.861	413.095	65.7561	65.8301	10.3271
10368	20091124	-1	-1	19.8713	468.519	104.564	32.9019	7.52868
10368	20091124	-1	1	19.8713	380.303	56.6756	67.1145	17.2961
10368	20091124	1	-1	19.8713	425.758	65.559	42.7633	6.85215
10368	20091124	1	1	19.8713	421.795	141.484	180.672	20.8757
10368	20101123	-1	-1	20.8679	371.667	43.069	44.5381	51.219
10368	20101123	-1	1	20.8679	479.63	248.855	44.6065	12.9906
10368	20101123	1	-1	20.8679	439.744	88.8555	47.296	4.1793
10368	20101123	1	1	20.8679	388.889	32.2749	41.1864	10.7601
10368	20121017	-1	-1	22.7679	423.611	132.47	33.583	14.0531
10368	20121017	-1	1	22.7679	381.944	42.9107	64.5818	48.0417
10368	20121017	1	-1	22.7679	426.667	118.426	48.721	7.61387
10368	20121017	1	1	22.7679	329.167	62.8149	96.2861	27.9965
10370	20091201	-1	-1	13.8973	551.515	276.933	99.5979	40.9831
10370	20091201	-1	1	13.8973	533.333	128.904	94.2804	27.4447
10370	20091201	1	-1	13.8973	595.833	231.063	124.846	1.47962
10370	20091201	1	1	13.8973	401.667	190.589	64.2988	23.8334
10370	20101120	-1	-1	14.8665	521.212	126.511	22.7758	54.0018
10370	20101120	-1	1	14.8665	515.278	217.592	58.8934	6.83491
10370	20101120	1	-1	14.8665	490	200.772	46.5128	28.2218
10370	20101120	1	1	14.8665	415.278	65.6969	40.7235	17.7521
10385	20061114	-1	-1	18.8583	654.167	249.962	42.5396	19.4363
10385	20061114	-1	1	18.8583	442.424	59.7976	32.8921	7.4253
10385	20061114	1	-1	18.8583	557.778	141.963	27.889	14.8788
10385	20061114	1	1	18.8583	456.41	97.5483	49.7624	6.44246
10385	20071114	-1	-1	19.8576	513.889	102.945	46.4955	18.2753
10385	20071114	-1	1	19.8576	425.641	88.8755	46.4334	36.6979
10385	20071114	1	-1	19.8576	640.476	180.421	39.9207	20.2552
10385	20071114	1	1	19.8576	472.222	132.447	28.0817	12.1162
10385	20081217	-1	-1	20.95	438.889	141.302	57.3394	2.60897
10385	20081217	-1	1	20.95	504.545	277.598	62.5314	38.7238
10385	20081217	1	-1	20.95	475.641	172.081	66.3071	19.1885
10385	20081217	1	1	20.95	418.333	64.0457	47.4438	7.49038
10385	20091125	-1	-1	21.8891	486.111	224.602	30.9895	28.7417
10385	20091125	-1	1	21.8891	392.308	44.4177	60.7495	21.7665
10385	20091125	1	-1	21.8891	451.111	132.208	34.7847	10.3051
10385	20091125	1	1	21.8891	392.308	89.3949	32.0594	32.8306
10385	20110129	-1	-1	23.0663	426.923	103.758	31.4157	10.3529
10385	20110129	-1	1	23.0663	493.056	156.583	41.0838	11.6447
10385	20110129	1	-1	23.0663	440.476	168.162	25.0587	14.2852
10385	20110129	1	1	23.0663	464.103	131.91	33.5404	17.471
10385	20120414	-1	-1	24.2737	448.611	123.799	35.3134	6.37437
10385	20120414	-1	1	24.2737	366.667	49.4413	32.1319	19.9429
10385	20120414	1	-1	24.2737	384.444	70.2791	26.2399	1.21513
10385	20120414	1	1	24.2737	420.833	123.117	56.4827	9.28437
10385	20130323	-1	-1	25.2128	494.444	181.789	34.3975	9.90057
10385	20130323	-1	1	25.2128	455.556	265.94	52.3188	8.107
10385	20130323	1	-1	25.2128	478.571	137.659	41.4839	14.5641
10385	20130323	1	1	25.2128	376.389	47.9153	52.0343	5.41127
10385	20140405	-1	-1	26.2477	520.238	147.077	30.1867	10.3182
10385	20140405	-1	1	26.2477	415.476	83.5802	32.4761	4.41791
10385	20140405	1	-1	26.2477	423.077	137.19	22.1873	29.3923
10385	20140405	1	1	26.2477	423.81	83.8992	35.8659	1.5158
10385	20150505	-1	-1	27.3292	407.692	100.833	85.9779	10.9857
10385	20150505	-1	1	27.3292	427.381	168.782	57.0938	47.308
10385	20150505	1	-1	27.3292	391.026	67.5687	32.6814	8.11781
10385	20150505	1	1	27.3292	424.359	216.412	80.533	11.6046
10406	20090611	-1	-1	16.4243	371.795	67.8317	32.7743	12.9192
10406	20090611	-1	1	16.4243	373.077	46.4172	51.2808	9.35293
10406	20090611	1	-1	16.4243	411.111	142.632	25.1561	0.557671
10406	20090611	1	1	16.4243	404.762	53.6802	47.7059	12.6828
10406	20110314	-1	-1	18.1793	318.056	39.2212	64.2672	8.6964
10406	20110314	-1	1	18.1793	357.692	51.1965	75.1879	14.9861
10406	20110314	1	-1	18.1793	326.667	37.1612	53.182	2.10536
10406	20110314	1	1	18.1793	390.278	41.7171	37.2701	1.19445
10406	20120806	-1	-1	19.5783	314.815	39.4796	56.1859	22.858
10406	20120806	-1	1	19.5783	347.222	38.8167	140.1	34.8154
10406	20120806	1	-1	19.5783	367.949	80.0641	50.9621	36.2529
10406	20120806	1	1	19.5783	331.818	41.1329	64.0742	25.3076
10406	20130808	-1	-1	20.5831	388.889	115.543	22.9481	10.7596
10406	20130808	-1	1	20.5831	443.333	78.6459	40.7243	3.45626
10406	20130808	1	-1	20.5831	398.485	62.1175	22.9463	17.8994
10406	20130808	1	1	20.5831	437.179	126.409	37.5404	5.57588
10408	20070407	-1	-1	14.2505	509.259	260.756	57.2658	3.90924
10408	20070407	-1	1	14.2505	383.333	96.7733	41.7353	6.97006
10408	20070407	1	-1	14.2505	562.963	235.522	61.8905	22.5653
10408	20070407	1	1	14.2505	403.333	76.0929	69.6894	34.1359
10408	20080522	-1	-1	15.3758	428.788	42.8764	50.855	7.83988
10408	20080522	-1	1	15.3758	389.394	110.119	83.1945	13.8598
10408	20080522	1	-1	15.3758	413.333	74.4527	64.248	20.2323
10408	20080522	1	1	15.3758	394.872	99.6254	52.1657	10.242
10408	20090623	-1	-1	16.4627	374.074	70.2728	47.8748	73.5533
10408	20090623	-1	1	16.4627	439.744	173.544	95.5668	6.25071
10408	20090623	1	-1	16.4627	390.476	49.231	78.2745	34.9472
10408	20090623	1	1	16.4627	496.97	234.262	78.5654	36.792
10409	20070314	-1	-1	17.18	464.103	212.769	33.5903	10.5096
10409	20070314	-1	1	17.18	341.111	50.7353	43.1955	7.12136
10409	20070314	1	-1	17.18	413.333	204.92	50.1188	1.63601
10409	20070314	1	1	17.18	421.795	190.927	34.7469	13.2692
10409	20100420	-1	-1	20.2819	470.513	128.228	56.9917	12.0291
10409	20100420	-1	1	20.2819	346.429	40.3926	44.3333	17.5905
10409	20100420	1	-1	20.2819	405.952	93.0507	37.5401	0.0418437
10409	20100420	1	1	20.2819	387.5	143.218	43.2523	3.01386
10443	20070730	-1	-1	14.5708	491.667	185.908	44.4702	6.31512
10443	20070730	-1	1	14.5708	445.556	140.643	46.5573	11.5722
10443	20070730	1	-1	14.5708	554.444	213.481	58.0061	30.1365
10443	20070730	1	1	14.5708	607.778	217.66	53.9526	23.4766
10451	20070816	-1	-1	15.6194	468.182	186.705	71.0416	23.5831
10451	20070816	-1	1	15.6194	345.455	112.569	95.1235	45.0369
10451	20070816	1	-1	15.6194	456.25	123.101	106.775	23.7262
10451	20070816	1	1	15.6194	345	65.7577	45.5602	16.7994
10451	20090115	-1	-1	17.0376	383.333	119.342	33.0416	4.83527
10451	20090115	-1	1	17.0376	383.333	110.554	46.3554	11.3887
10451	20090115	1	-1	17.0376	397.619	107.984	66.3309	11.5086
10451	20090115	1	1	17.0376	396.154	138.135	39.2772	2.22894
10470	20071015	-1	-1	16.7584	500	211.476	92.6431	58.9694
10470	20071015	-1	1	16.7584	453.571	110.589	76.9517	2.86386
10470	20071015	1	-1	16.7584	673.333	275.94	77.26	12.4086
10470	20071015	1	1	16.7584	456.061	110.371	66.3008	6.34107
10470	20131009	-1	-1	22.7433	427.778	77.8344	70.828	33.193
10470	20131009	-1	1	22.7433	382.222	59.2502	60.9021	3.44094
10470	20131009	1	-1	22.7433	428.889	132.358	73.5322	21.9519
10470	20131009	1	1	22.7433	433.333	139.29	46.082	6.24399
10470	20141014	-1	-1	23.7563	393.056	90.022	53.8133	15.7751
10470	20141014	-1	1	23.7563	315.278	76.6925	59.4199	5.71281
10470	20141014	1	-1	23.7563	434.444	125.43	51.6305	5.43955
10470	20141014	1	1	23.7563	363.636	169.61	69.3742	0.0147613
10472	20100630	-1	-1	14.475	493.59	358.271	110.588	15.4985
10472	20100630	-1	1	14.475	437.5	127.748	77.6537	5.71083
10472	20100630	1	-1	14.475	412.222	146.041	58.5867	12.1489
10472	20100630	1	1	14.475	403.03	91.8387	76.5972	19.264
10472	20101012	-1	-1	14.7597	362.121	78.9131	48.8154	5.33934
10472	20101012	-1	1	14.7597	461.667	106.299	61.0351	29.5878
10472	20101012	1	-1	14.7597	451.282	267.919	44.327	15.1896
10472	20101012	1	1	14.7597	512.963	161.326	52.7821	20.2352
10479	20101120	-1	-1	12.8788	575	246.234	51.6502	10.7729
10479	20101120	-1	1	12.8788	518.333	94.1007	63.3623	8.10295
10479	20101120	1	-1	12.8788	461.667	134.497	66.4102	22.2646
10479	20101120	1	1	12.8788	520.833	229.638	65.0434	12.833
10480	20101023	-1	-1	13.8069	448.485	85.4578	108.415	86.1055
10480	20101023	-1	1	13.8069	412.821	75.5087	52.8163	8.09547
10480	20101023	1	-1	13.8069	475.641	84.0567	112.114	4.47083
10480	20101023	1	1	13.8069	504.167	177.116	75.6905	13.0861
10483	20071215	-1	-1	15.937	385.185	122.6	80.2396	6.59902
10483	20071215	-1	1	15.937	519.444	303.667	114.148	14.6105
10483	20071215	1	-1	15.937	405.556	35.0565	66.7157	43.8093
10483	20071215	1	1	15.937	412.821	125.49	95.5604	14.7572
10489	20071112	-1	-1	17.8316	637.5	298.153	62.5169	29.8601
10489	20071112	-1	1	17.8316	344.872	95.3514	105.159	47.927
10489	20071112	1	-1	17.8316	587.037	244.776	55.8456	5.73521
10489	20071112	1	1	17.8316	524.242	190.812	68.4056	18.2942
10489	20081209	-1	-1	18.9075	536.111	218.562	47.7953	18.8188
10489	20081209	-1	1	18.9075	422.619	68.7517	50.8452	2.15921
10489	20081209	1	-1	18.9075	484.524	138.438	77.8521	14.9829
10489	20081209	1	1	18.9075	338.889	98.8145	39.0253	51.5387
10489	20100107	-1	-1	19.9863	459.091	138.115	38.6681	66.1657
10489	20100107	-1	1	19.9863	422.727	268.77	63.6216	5.98146
10489	20100107	1	-1	19.9863	495.238	209.03	75.9668	16.9145
10489	20100107	1	1	19.9863	431.667	246.137	115.228	2.15223
10500	20080115	-1	-1	14.0314	545.455	219.86	95.4288	22.2861
10500	20080115	-1	1	14.0314	596.429	166.176	71.6916	0.366939
10500	20080115	1	-1	14.0314	595	235.447	106.519	22.8444
10500	20080115	1	1	14.0314	460.256	197.735	56.7618	7.17206
10500	20090425	-1	-1	15.3073	550	228.174	83.8667	38.8482
10500	20090425	-1	1	15.3073	651.515	267.442	71.566	27.9332
10500	20090425	1	-1	15.3073	600	265.739	92.5731	21.347
10500	20090425	1	1	15.3073	557.407	221.596	95.3775	6.64987
10500	20100508	-1	-1	16.3422	617.857	187.706	55.0659	3.91554
10500	20100508	-1	1	16.3422	539.744	147.751	97.0891	26.7636
10500	20100508	1	-1	16.3422	613.095	188.469	53.2557	29.3057
10500	20100508	1	1	16.3422	506.061	193.545	69.1424	0.776008
10527	20160109	-1	-1	16.0219	597.619	147.175	40.5216	9.58247
10527	20160109	-1	1	16.0219	471.795	107.666	52.7063	29.2736
10527	20160109	1	-1	16.0219	586.667	126.491	57.7278	1.31787
10527	20160109	1	1	16.0219	533.333	210.599	59.6358	18.7234
10529	20080219	-1	-1	16.1177	702.083	196.888	68.7274	25.0519
10529	20080219	-1	1	16.1177	486.111	224.206	56.9527	39.4502
10529	20080219	1	-1	16.1177	562.5	357.876	76.736	4.00045
10529	20080219	1	1	16.1177	479.167	268.557	63.7625	14.8747
10613	20100225	-1	-1	27.132	426.667	67.2199	62.5214	31.0529
10613	20100225	-1	1	27.132	391.667	75.3198	41.9497	5.47314
10613	20100225	1	-1	27.132	431.944	78.6433	101.361	11.9375
10613	20100225	1	1	27.132	428.571	238.355	128.239	31.5896
10622	20100329	-1	-1	27.2389	357.692	84.6057	95.9988	5.39308
10622	20100329	-1	1	27.2389	433.333	80.3638	36.0664	30.1467
10622	20100329	1	-1	27.2389	396.154	75.2015	44.1711	7.74669
10622	20100329	1	1	27.2389	392.593	57.8018	63.8727	32.881
10686	20100519	-1	-1	17.3607	344.444	162.886	102.17	43.273
10686	20100519	-1	1	17.3607	336.905	68.9291	69.8768	7.06394
10686	20100519	1	-1	17.3607	417.778	237.419	94.9788	10.0312
10686	20100519	1	1	17.3607	329.487	41.4739	47.2366	4.98217
10699	20100522	-1	-1	16.3805	480.556	235.363	25.9154	13.3955
10699	20100522	-1	1	16.3805	462.821	68.4328	47.0131	21.0158
10699	20100522	1	-1	16.3805	496.667	215.951	42.8129	11.8166
10699	20100522	1	1	16.3805	420.833	59.5119	23.2059	11.6918
10699	20111217	-1	-1	17.9521	423.611	159.775	32.1152	6.90884
10699	20111217	-1	1	17.9521	438.462	75.8851	41.8697	13.4172
10699	20111217	1	-1	17.9521	525.556	176.706	25.1915	7.9792
10699	20111217	1	1	17.9521	405.128	42.1553	36.174	14.5086
10699	20130108	-1	-1	19.0143	412.963	37.0602	34.7003	10.2484
10699	20130108	-1	1	19.0143	380.556	30.0112	121.464	63.7147
10699	20130108	1	-1	19.0143	456.41	186.778	74.5559	17.4977
10699	20130108	1	1	19.0143	406.944	45.2034	90.6492	68.1449
10703	20100202	-1	-1	16.0766	651.515	239.96	58.3927	26.6355
10703	20100202	-1	1	16.0766	577.273	221.143	159.522	8.20556
10703	20100202	1	-1	16.0766	627.273	155.505	79.3764	13.5935
10703	20100202	1	1	16.0766	497.436	126.719	80.9567	13.7156
10760	20100622	-1	-1	13.4483	541.667	148.916	75.6732	76.7195
10760	20100622	-1	1	13.4483	406.944	66.4612	120.632	34.3122
10760	20100622	1	-1	13.4483	596.154	220.705	86.8005	12.0821
10760	20100622	1	1	13.4483	483.333	104.822	91.737	8.76311
10767	20110613	-1	-1	12.4408	813.333	355.799	47.0411	3.18396
10767	20110613	-1	1	12.4408	615.278	176.592	109.991	6.04851
10767	20110613	1	-1	12.4408	733.333	328.987	91.5076	33.4243
10767	20110613	1	1	12.4408	548.333	140.644	76.0595	2.39313
10785	20100303	-1	-1	29.1362	561.111	196.733	66.3862	23.7028
10785	20100303	-1	1	29.1362	375.758	29.2153	45.8791	6.82037
10785	20100303	1	-1	29.1362	544.048	123.449	58.7256	5.41085
10785	20100303	1	1	29.1362	366.667	30.7318	60.574	7.16028
10793	20100310	-1	-1	27.1704	473.077	209.003	50.8903	24.4621
10793	20100310	-1	1	27.1704	367.949	65.7794	50.6549	14.0635
10793	20100310	1	-1	27.1704	427.778	62.0904	45.1243	13.0814
10793	20100310	1	1	27.1704	390.476	125.015	51.4505	17.703
10799	20100313	-1	-1	28.1697	326.389	49.4711	40.667	9.60421
10799	20100313	-1	1	28.1697	325.641	33.758	36.5281	8.07013
10799	20100313	1	-1	28.1697	350	58.8348	18.1029	1.32988
10799	20100313	1	1	28.1697	326.389	34.4204	28.8576	3.73097
10816	20100429	-1	-1	19.3101	323.611	71.2296	71.415	50.0185
10816	20100429	-1	1	19.3101	322.222	66.4137	70.625	47.7903
10816	20100429	1	-1	19.3101	350	72.9663	65.9719	23.1484
10816	20100429	1	1	19.3101	341.667	57.3327	28.2328	14.166
10816	20121212	-1	-1	21.9329	246.154	75.5087	18.9521	8.77675
10816	20121212	-1	1	21.9329	250	97.959	15.3346	5.92727
10816	20121212	1	-1	21.9329	307.143	170.559	18.4648	0.186296
10816	20121212	1	1	21.9329	251.282	55.8858	22.3699	0.243042
10816	20140108	-1	-1	23.0062	362.5	162.699	39.2796	4.61357
10816	20140108	-1	1	23.0062	302.564	26.2168	33.9203	5.99057
10816	20140108	1	-1	23.0062	329.167	45.0168	34.0097	4.73622
10816	20140108	1	1	23.0062	325	59.2461	36.2697	3.33415
10816	20150212	-1	-1	24.1013	312.5	65.5686	39.7249	12.9392
10816	20150212	-1	1	24.1013	316.667	43.8529	40.8604	3.8432
10816	20150212	1	-1	24.1013	338.462	79.4613	57.4689	16.582
10816	20150212	1	1	24.1013	323.611	32.1442	35.2997	8.41283
10825	20100609	-1	-1	17.4045	440.909	143.249	66.1637	26.5833
10825	20100609	-1	1	17.4045	360	57.3058	68.505	17.5834
10825	20100609	1	-1	17.4045	523.611	204.181	69.7751	32.9439
10825	20100609	1	1	17.4045	416.667	197.203	80.6989	24.7553
10847	20101204	-1	-1	14.924	583.333	212.277	57.7116	84.9321
10847	20101204	-1	1	14.924	346.667	36.6835	138.604	37.3104
10847	20101204	1	-1	14.924	511.667	88.5584	98.8264	137.865
10847	20101204	1	1	14.924	479.63	171.144	133.028	35.3127
10869	20101208	-1	-1	15.9206	673.81	288.652	117.788	12.2053
10869	20101208	-1	1	15.9206	420.833	87.1734	137.564	38.9995
10869	20101208	1	-1	15.9206	603.704	297.3	73.2744	0.104369
10869	20101208	1	1	15.9206	553.704	169.717	136.712	44.323
10878	20110226	-1	-1	15.154	573.81	148.167	46.281	6.73801
10878	20110226	-1	1	15.154	398.889	64.3856	44.8002	6.90856
10878	20110226	1	-1	15.154	420.238	72.2586	34.7891	20.5217
10878	20110226	1	1	15.154	473.333	185.678	63.1307	8.20517
10895	20131126	-1	-1	21.8918	571.212	235.477	25.241	26.5475
10895	20131126	-1	1	21.8918	481.944	196.877	49.4997	20.801
10895	20131126	1	-1	21.8918	514.103	152.578	49.0311	53.3311
10895	20131126	1	1	21.8918	471.795	193.815	56.9987	17.6556
10895	20160406	-1	-1	24.2519	517.949	138.354	68.2994	25.4691
10895	20160406	-1	1	24.2519	369.444	58.0984	104.95	30.1715
10895	20160406	1	-1	24.2519	423.077	73.4527	42.4484	15.502
10895	20160406	1	1	24.2519	389.286	84.3799	89.7289	1.57358
10927	20121110	-1	-1	21.8425	474.074	101.074	82.3263	7.19844
10927	20121110	-1	1	21.8425	347.436	50.8475	79.1692	45.2371
10927	20121110	1	-1	21.8425	525.641	195.744	43.3267	2.16912
10927	20121110	1	1	21.8425	392.424	108.106	73.6708	20.7413
11052	20121016	-1	-1	29.7604	496.97	258.179	32.6053	6.54798
11052	20121016	-1	1	29.7604	308.333	80.2458	45.6656	18.7801
11052	20121016	1	-1	29.7604	465.476	194.416	39.7019	5.67344
11052	20121016	1	1	29.7604	325.758	53.4185	55.5124	16.2584
11052	20130924	-1	-1	30.6995	372.727	132.764	79.9067	6.91516
11052	20130924	-1	1	30.6995	330.303	83.9372	72.0952	100.548
11052	20130924	1	-1	30.6995	385.897	142.375	81.8511	41.8917
11052	20130924	1	1	30.6995	333.333	61.9886	71.4164	11.3963
11054	20131119	-1	-1	24.8569	587.179	194.502	25.3652	5.87225
11054	20131119	-1	1	24.8569	464.103	110.312	62.6426	10.5293
11054	20131119	1	-1	24.8569	604.167	130.872	38.1746	12.5925
11054	20131119	1	1	24.8569	482.143	173.878	62.1162	17.4206
11072	20121120	-1	-1	27.8658	480.952	228.228	36.0573	8.6676
11072	20121120	-1	1	27.8658	328.205	63.6049	82.2023	29.0138
11072	20121120	1	-1	27.8658	572.222	210.975	27.4346	2.1618
11072	20121120	1	1	27.8658	323.611	137.153	59.7435	5.03708
11090	20140102	-1	-1	22.9952	437.778	165.528	29.4787	6.32239
11090	20140102	-1	1	22.9952	326.19	33.7881	38.7568	10.1387
11090	20140102	1	-1	22.9952	422.222	131.032	72.6663	3.9612
11090	20140102	1	1	22.9952	338.889	55.2009	63.2908	2.19472
11090	20150727	-1	-1	24.5585	431.25	80.8867	102.015	78.4391
11090	20150727	-1	1	24.5585	337.5	52.5161	95.891	21.2941
11090	20150727	1	-1	24.5585	363.333	85.2737	74.5406	1.21808
11090	20150727	1	1	24.5585	348.333	59.0302	55.0061	9.87817
11111	20140514	-1	-1	27.3484	634.524	229.777	44.2261	61.777
11111	20140514	-1	1	27.3484	443.333	124.052	44.9431	22.6648
11111	20140514	1	-1	27.3484	490.278	165.215	34.7943	28.027
11111	20140514	1	1	27.3484	452.381	148.188	50.956	47.0955
11111	20150511	-1	-1	28.3395	393.59	146.018	44.1468	6.82855
11111	20150511	-1	1	28.3395	330.769	60.7995	41.9246	0.870969
11111	20150511	1	-1	28.3395	327.778	69.7691	42.5312	0.793343
11111	20150511	1	1	28.3395	303.03	45.2267	56.4116	13.5338
11111	20160503	-1	-1	29.3196	434.615	116.758	31.915	21.5769
11111	20160503	-1	1	29.3196	385.714	72.459	55.2102	22.9328
11111	20160503	1	-1	29.3196	482.143	248.454	54.7548	21.3973
11111	20160503	1	1	29.3196	367.949	46.8753	50.3716	5.15956
11116	20130130	-1	-1	23.0691	585	85.1469	61.9837	35.2999
11116	20130130	-1	1	23.0691	469.697	184.665	37.4652	10.9504
11116	20130130	1	-1	23.0691	605.952	134.706	49.2743	10.5379
11116	20130130	1	1	23.0691	478.788	224.98	53.9298	23.8613
11116	20140129	-1	-1	24.0657	637.037	230.154	22.7915	2.70907
11116	20140129	-1	1	24.0657	434.722	113.587	40.3228	0.952404
11116	20140129	1	-1	24.0657	588.462	179.555	64.8851	13.6352
11116	20140129	1	1	24.0657	460.714	209.457	49.4319	0.636036
11151	20130422	-1	-1	22.2806	379.167	278.536	79.0948	20.0402
11151	20130422	-1	1	22.2806	424.242	190.52	48.8419	14.2085
11151	20130422	1	-1	22.2806	414.444	136.549	55.5451	4.30253
11151	20130422	1	1	22.2806	398.333	89.7356	39.1448	2.45741
11183	20150902	-1	-1	32.6653	447.619	259.261	80.0776	1.89056
11183	20150902	-1	1	32.6653	375.641	75.6501	59.6349	22.0358
11183	20150902	1	-1	32.6653	422.619	162.066	47.59	12.9015
11183	20150902	1	1	32.6653	379.167	100.284	55.735	9.96271
11214	20131022	-1	-1	21.7769	565.152	273.907	35.5461	7.7859
11214	20131022	-1	1	21.7769	455.128	232.477	56.4782	6.74993
11214	20131022	1	-1	21.7769	484.722	103.587	58.8628	1.14319
11214	20131022	1	1	21.7769	392.857	44.6804	47.5026	8.69652
11214	20141204	-1	-1	22.8939	457.407	77.3301	77.3383	10.1724
11214	20141204	-1	1	22.8939	388.333	60.8834	52.7893	21.9435
11214	20141204	1	-1	22.8939	484.444	129.478	46.3729	29.473
11214	20141204	1	1	22.8939	425	192.341	49.8953	17.5497
11216	20131024	-1	-1	22.7981	400	209.762	64.277	2.71352
11216	20131024	-1	1	22.7981	318.333	34.6499	66.7657	13.651
11216	20131024	1	-1	22.7981	393.333	147.169	70.0188	6.00083
11216	20131024	1	1	22.7981	315.385	47.3665	70.3172	4.82705
11216	20140910	-1	-1	23.6769	393.056	90.022	53.8133	15.7751
11216	20140910	-1	1	23.6769	315.278	76.6925	59.4199	5.71281
11216	20140910	1	-1	23.6769	434.444	125.43	51.6305	5.43955
11216	20140910	1	1	23.6769	363.636	169.61	69.3742	0.0147613
11216	20150513	-1	-1	24.3477	454.444	145.087	44.4998	7.89651
11216	20150513	-1	1	24.3477	315.385	73.743	57.9111	7.85202
11216	20150513	1	-1	24.3477	444.444	129.967	33.9057	8.79193
11216	20150513	1	1	24.3477	283.333	48.1125	57.9899	16.7136
11217	20131022	-1	-1	19.7919	414.286	118.006	71.2721	18.6277
11217	20131022	-1	1	19.7919	357.692	107.069	47.1423	16.0167
11217	20131022	1	-1	19.7919	551.111	220.071	88.957	27.4764
11217	20131022	1	1	19.7919	336.905	75.724	87.7926	6.27084
11217	20141203	-1	-1	20.9062	363.889	95.8306	43.7843	45.2002
11217	20141203	-1	1	20.9062	389.744	80.6623	67.3825	20.6943
11217	20141203	1	-1	20.9062	430	151.867	40.5783	0.654708
11217	20141203	1	1	20.9062	374.242	73.1679	40.1551	6.85483
11217	20151012	-1	-1	21.7632	364.286	64.3366	70.8497	13.6556
11217	20151012	-1	1	21.7632	411.111	250.924	63.9814	7.62845
11217	20151012	1	-1	21.7632	381.111	78.8978	51.1784	1.77536
11217	20151012	1	1	21.7632	383.333	186.948	49.271	9.8129
