# Supplementary material for: The expression of established cognitive brain states stabilizes with working memory development
Source: eLife journal article supplement (doi:10.7554/elife.25606), 2017-08-19
Supplement: supp [file Figure 6 Data.xlsx]

## Sheet: Figure 6
ID	Date	Mean % Correct	Total Brain State Var	VME Variability	Maint Variability	Retrieval Variability	Motion Variability	Mean FD	Age
10124	20060803	85	0.01785	0.007419	0.004335	0.006096	0.062806	0.0724924	13.566
10124	20070829	78.3333	0.016185	0.009028	0.002729	0.004428	0.081681	0.089264	14.6365
10125	20050809	73.3333	0.019408	0.011337	0.003727	0.004344	0.101242	0.0643483	16.5832
10125	20061021	63.3333	0.024494	0.01595	0.004045	0.004499	0.071833	0.0625717	17.7823
10125	20070928	88.3333	0.018622	0.010738	0.003083	0.004801	0.078446	0.0883232	18.7187
10128	20070808	86.6667	0.017589	0.008928	0.003706	0.004955	0.040285	0.0663035	20.5694
10128	20080910	80	0.015993	0.008542	0.003462	0.003989	0.035728	0.0524483	21.6618
10128	20090827	88.3333	0.01562	0.008775	0.003465	0.003381	0.04428	0.0517187	22.6228
10128	20120418	90	0.01738	0.010231	0.003674	0.003475	0.057799	0.0601663	25.2649
10128	20130522	73.3333	0.015437	0.008396	0.003777	0.003264	0.111111	0.06086	26.3573
10128	20140423	83.3333	0.012824	0.006847	0.003065	0.002912	0.055266	0.0464151	27.2772
10129	20070811	81.6667	0.018942	0.010834	0.002766	0.005342	0.081813	0.0894383	15.5865
10129	20081007	75	0.016866	0.010337	0.002423	0.004106	0.080875	0.0901592	16.7447
10129	20090825	60	0.013798	0.007015	0.002977	0.003805	0.106002	0.102524	17.6262
10130	20050809	78.3333	0.016094	0.007918	0.00311	0.005065	0.05961	0.0590473	14.5954
10132	20050816	73.3333	0.014889	0.007307	0.00312	0.004462	0.041203	0.0493007	17.6071
10132	20061130	71.6667	0.015055	0.008743	0.002655	0.003657	0.052887	0.063442	18.8966
10133	20071204	76.6667	0.015844	0.00841	0.00374	0.003694	0.074319	0.0702902	10.913
10133	20150804	93.3333	0.014094	0.006172	0.00304	0.004882	0.049504	0.0685846	18.579
10134	20111217	81.6667	0.009905	0.004673	0.00248	0.002751	0.032806	0.0558089	28.9555
10134	20130323	76.6667	0.008953	0.003768	0.00247	0.002715	0.03672	0.0624335	30.2204
10134	20140118	66.6667	0.009911	0.004976	0.002006	0.002929	0.073721	0.0680778	31.0444
10136	20060715	78.3333	0.013834	0.006203	0.003495	0.004137	0.078914	0.0569642	15.5346
10136	20080804	66.6667	0.015428	0.007894	0.00362	0.003915	0.07137	0.0540604	17.5907
10136	20090716	80	0.014033	0.007117	0.003069	0.003847	0.062525	0.044417	18.538
10136	20120814	86.6667	0.016289	0.008808	0.002791	0.004689	0.043867	0.0407137	21.6181
10136	20140118	88.3333	0.018457	0.010877	0.003175	0.004405	0.049901	0.0495813	23.0472
10138	20100213	98.3333	0.014889	0.008958	0.002261	0.00367	0.074361	0.0606026	21.1143
10138	20120416	75	0.016604	0.00978	0.00267	0.004154	0.057784	0.0477809	23.2854
10138	20141111	78.3333	0.015798	0.009227	0.002259	0.004313	0.056892	0.041763	25.8562
10145	20050802	85	0.014172	0.007827	0.003096	0.003249	0.068893	0.0648999	15.5592
10148	20070315	96.6667	0.015369	0.008673	0.003206	0.00349	0.047614	0.045154	15.1704
10148	20070811	90	0.016342	0.008284	0.003616	0.004442	0.067943	0.0535346	15.5784
10148	20080819	86.6667	0.01747	0.008701	0.003685	0.005085	0.045802	0.0509595	16.6023
10148	20090826	81.6667	0.016363	0.00809	0.003741	0.004532	0.048585	0.0483342	17.6208
10148	20120815	85	0.019495	0.01092	0.003719	0.004856	0.042818	0.0524828	20.5914
10148	20130810	81.6667	0.01641	0.009099	0.003046	0.004265	0.038938	0.0611944	21.577
10148	20151215	90	0.019149	0.010614	0.003776	0.004759	0.033152	0.0677913	23.9233
10152	20050815	71.6667	0.019208	0.011231	0.003822	0.004154	0.052978	0.0436697	12.6078
10152	20120307	73.3333	0.0207	0.01243	0.003333	0.004937	0.062967	0.040251	19.1677
10152	20130305	78.3333	0.0194	0.012019	0.00331	0.004071	0.047483	0.0337556	20.1615
10152	20140312	66.6667	0.010264	0.005167	0.002189	0.002907	0.03746	0.0321001	21.18
10152	20150312	93.3333	0.017682	0.009504	0.003171	0.005007	0.071645	0.0425209	22.1793
10153	20050815	91.6667	0.020127	0.013134	0.003096	0.003898	0.07907	0.0540459	10.6064
10153	20081104	93.3333	0.026935	0.01583	0.004438	0.006667	0.07104	0.0589346	13.8289
10153	20090728	75	0.018316	0.011282	0.002927	0.004107	0.065622	0.0604451	14.5571
10156	20060826	85	0.012839	0.005033	0.002941	0.004865	0.058307	0.0690592	13.6482
10156	20070707	86.6667	0.014517	0.006184	0.003526	0.004807	0.075969	0.0968654	14.5106
10156	20080703	96.6667	0.017495	0.008397	0.004075	0.005023	0.049853	0.0558845	15.5017
10156	20090711	83.3333	0.015495	0.005992	0.003539	0.005964	0.066489	0.0655863	16.5229
10156	20130112	85	0.015649	0.006737	0.002851	0.00606	0.064784	0.05415	20.0301
10156	20141025	70	0.015704	0.007189	0.003171	0.005344	0.073122	0.0396781	21.8124
10156	20151109	83.3333	0.016121	0.007306	0.004	0.004815	0.042841	0.0441447	22.8528
10161	20051111	93.3333	0.023118	0.01081	0.005031	0.007277	0.072676	0.0687351	16.8432
10161	20070719	86.6667	0.022784	0.01165	0.004299	0.006835	0.054458	0.0362955	18.527
10161	20081023	96.6667	0.018994	0.00939	0.004265	0.005339	0.055472	0.0470968	19.7919
10161	20090820	68.3333	0.021581	0.010531	0.004945	0.006106	0.073136	0.0453466	20.616
10161	20130605	85	0.021164	0.011657	0.003134	0.006374	0.063044	0.0341082	24.4079
10161	20150602	88.3333	0.022751	0.014223	0.003393	0.005135	0.049516	0.0530208	26.3983
10162	20050921	53.3333	0.014692	0.006482	0.00333	0.00488	0.055668	0.0453501	17.7029
10162	20061220	86.6667	0.011365	0.00541	0.002225	0.003731	0.045229	0.0395913	18.9486
10162	20071219	81.6667	0.012752	0.005895	0.002903	0.003953	0.051988	0.0665217	19.9452
10162	20081215	100	0.013151	0.00516	0.003307	0.004684	0.060635	0.052654	20.9363
10163	20060731	85	0.019378	0.013091	0.002761	0.003527	0.058652	0.0539186	20.5695
10163	20070712	90	0.020428	0.013169	0.003499	0.00376	0.071525	0.0559602	21.5168
10163	20091010	85	0.018752	0.011442	0.00291	0.0044	0.061868	0.0638021	23.7645
10169	20051102	73.3333	0.013193	0.006902	0.002781	0.00351	0.113955	0.141718	11.8302
10169	20070303	86.6667	0.011733	0.006096	0.001983	0.003654	0.09598	0.134039	13.1608
10173	20061207	76.6667	0.017902	0.009426	0.00394	0.004536	0.073533	0.0668961	14.9131
10173	20070818	76.6667	0.017055	0.009874	0.002937	0.004244	0.075507	0.0887202	15.6085
10173	20090121	85	0.014249	0.007288	0.003333	0.003628	0.059512	0.044903	17.0376
10173	20090826	98.3333	0.013876	0.006709	0.003006	0.004162	0.046358	0.0421623	17.6317
10173	20120515	58.3333	0.01792	0.011361	0.002988	0.003571	0.055226	0.0658	20.3504
10173	20130523	98.3333	0.014822	0.008678	0.002575	0.003569	0.052282	0.0470563	21.3716
10173	20150527	68.3333	0.017335	0.010144	0.002718	0.004472	0.06057	0.107454	23.3812
10173	20160511	96.6667	0.014516	0.007773	0.002398	0.004346	0.049728	0.0547755	24.3395
10174	20070509	76.6667	0.015184	0.008176	0.003405	0.003603	0.063611	0.0572645	20.3231
10174	20080828	75	0.01522	0.008266	0.003114	0.00384	0.048444	0.063806	21.629
10174	20150411	88.3333	0.011889	0.006537	0.003005	0.002348	0.072913	0.0796197	28.2464
10175	20061113	100	0.017505	0.009267	0.002625	0.005612	0.066923	0.047807	16.835
10175	20081218	88.3333	0.01775	0.008058	0.002639	0.007054	0.055328	0.0484375	18.9322
10175	20100608	95	0.016396	0.00765	0.003088	0.005657	0.063421	0.0620224	20.4025
10176	20061106	90	0.015711	0.008557	0.003429	0.003726	0.098253	0.0821789	18.8309
10176	20080818	88.3333	0.012576	0.006898	0.002479	0.003198	0.05022	0.0654239	20.6132
10176	20090601	81.6667	0.014379	0.007682	0.003175	0.003522	0.078299	0.070464	21.399
10177	20070329	93.3333	0.012535	0.005894	0.003105	0.003535	0.088238	0.11326	18.2204
10180	20050920	78.3333	0.011994	0.006219	0.002995	0.00278	0.072442	0.0335971	19.707
10180	20070113	86.6667	0.011173	0.005934	0.002351	0.002887	0.046748	0.0437242	21.0212
10181	20051212	83.3333	0.019171	0.009284	0.004198	0.005688	0.068171	0.0615565	12.9172
10181	20061216	76.6667	0.019226	0.01165	0.003498	0.004078	0.05177	0.087861	13.9274
10181	20080102	75	0.019237	0.01002	0.003261	0.005956	0.085681	0.120791	14.9733
10183	20080517	75	0.015634	0.00739	0.003542	0.004701	0.110947	0.135616	14.3572
10183	20160107	80	0.013251	0.00748	0.001937	0.003834	0.038565	0.0656559	21.9986
10184	20070526	78.3333	0.017067	0.009958	0.002775	0.004334	0.107216	0.12126	13.3798
10184	20120725	76.6667	0.022132	0.012926	0.002992	0.006214	0.071151	0.076642	18.5462
10184	20130918	85	0.019442	0.010834	0.0027	0.005907	0.059635	0.0815542	19.6961
10184	20150512	78.3333	0.015594	0.009411	0.00246	0.003723	0.050437	0.0673244	21.3415
10185	20051004	63.3333	0.014402	0.008171	0.002697	0.003533	0.052172	0.0376116	19.7536
10185	20070426	91.6667	0.012709	0.006485	0.002519	0.003705	0.03372	0.042756	21.3114
10185	20120104	95	0.015526	0.00952	0.00284	0.003166	0.038972	0.0492405	26.0041
10185	20130227	75	0.015603	0.009218	0.003035	0.00335	0.050006	0.048961	27.154
10185	20140416	93.3333	0.014828	0.009385	0.00215	0.003294	0.042259	0.0337968	28.2847
10185	20150413	91.6667	0.012004	0.007289	0.002084	0.002632	0.028265	0.0487144	29.2758
10186	20071130	68.3333	0.013718	0.006637	0.002707	0.004374	0.051315	0.0477933	17.8863
10186	20100310	95	0.013345	0.006535	0.002587	0.004222	0.046403	0.0396601	20.1615
10187	20051215	86.6667	0.012417	0.006008	0.003041	0.003368	0.129509	0.0548552	15.926
10187	20070125	81.6667	0.015716	0.008421	0.003485	0.003811	0.074311	0.0559172	17.0376
10187	20080111	100	0.014069	0.007824	0.002045	0.0042	0.062331	0.0520613	17.9986
10187	20090204	86.6667	0.015644	0.008683	0.002255	0.004706	0.108737	0.0374681	19.0664
10187	20100105	90	0.013439	0.006892	0.003458	0.00309	0.084106	0.0548887	19.9835
10187	20120710	93.3333	0.014673	0.007463	0.003019	0.004191	0.057319	0.0457457	22.4941
10187	20130801	88.3333	0.01284	0.006048	0.003345	0.003448	0.067064	0.0530507	23.5537
10187	20140911	90	0.012376	0.006752	0.002296	0.003328	0.04136	0.0271908	24.6653
10187	20150812	98.3333	0.011078	0.005577	0.002296	0.003206	0.036656	0.0418284	25.5824
10188	20051214	91.6667	0.014858	0.007931	0.003537	0.00339	0.131012	0.0472823	17.9384
10188	20071017	73.3333	0.017021	0.009255	0.003997	0.003769	0.093153	0.0615101	19.7782
10188	20090115	86.6667	0.015583	0.009156	0.003159	0.003267	0.065436	0.0478315	21.0267
10188	20091015	91.6667	0.015101	0.008717	0.002574	0.003811	0.056696	0.0405898	21.7741
10189	20070607	86.6667	0.013348	0.006334	0.003761	0.003253	0.042964	0.0638291	22.4038
10192	20051222	85	0.020749	0.010396	0.004733	0.00562	0.052283	0.0540855	15.9452
10192	20070127	91.6667	0.020303	0.010407	0.004338	0.005559	0.04805	0.0548961	17.0431
10192	20080119	60	0.025706	0.013733	0.005306	0.006667	0.056008	0.0527553	18.0205
10192	20090314	86.6667	0.022232	0.013092	0.004218	0.004921	0.068745	0.0510349	19.1704
10192	20100112	81.6667	0.019837	0.010324	0.004726	0.004788	0.074551	0.0733027	20.0027
10192	20120725	86.6667	0.026341	0.014567	0.005177	0.006597	0.043813	0.0668317	22.5352
10192	20130507	90	0.019216	0.00984	0.003292	0.006083	0.077346	0.0740982	23.3182
10192	20140501	86.6667	0.018629	0.011225	0.002827	0.004577	0.067606	0.0606745	24.3011
10192	20150511	90	0.018199	0.010232	0.004017	0.00395	0.032702	0.0815853	25.3278
10193	20060204	81.6667	0.017046	0.009094	0.003002	0.004951	0.053597	0.0494524	14.089
10193	20071208	70	0.022482	0.012723	0.004432	0.005327	0.064305	0.0659362	15.9288
10193	20090411	90	0.019204	0.011223	0.003108	0.004874	0.046514	0.0495214	17.2703
10193	20100116	91.6667	0.017733	0.00924	0.004143	0.00435	0.057254	0.0570351	18.0369
10194	20070124	91.6667	0.014285	0.006165	0.003451	0.004668	0.055138	0.0501081	19.0581
10194	20071208	76.6667	0.016232	0.009306	0.003375	0.003551	0.068416	0.0697274	19.9288
10195	20151216	76.6667	0.018443	0.012798	0.002483	0.003162	0.049535	0.0522774	21.9521
10199	20130612	91.6667	0.013314	0.007271	0.002837	0.003206	0.092227	0.0717439	21.4456
10199	20140709	98.3333	0.013887	0.007194	0.003341	0.003353	0.130446	0.0469283	22.5188
10201	20060126	70	0.014525	0.006989	0.003705	0.00383	0.126084	0.143689	11.0581
10201	20061209	85	0.01827	0.0087	0.004447	0.005123	0.082447	0.0699751	11.926
10201	20071103	91.6667	0.016002	0.007565	0.003798	0.004638	0.056043	0.0739287	12.8268
10202	20060123	88.3333	0.01507	0.007479	0.003223	0.004367	0.079415	0.0497889	17.0431
10202	20061118	96.6667	0.014497	0.007641	0.003187	0.003669	0.068945	0.0841205	17.8617
10202	20071218	91.6667	0.016611	0.008857	0.003252	0.004502	0.061696	0.043109	18.9431
10202	20090109	81.6667	0.01701	0.009393	0.003124	0.004493	0.084196	0.0458735	20.0054
10202	20100112	83.3333	0.01294	0.00611	0.002933	0.003897	0.056366	0.0403294	21.013
10202	20160112	80	0.013541	0.007363	0.002384	0.003794	0.060617	0.0779566	27.0116
10204	20060105	83.3333	0.013874	0.007435	0.002713	0.003725	0.042779	0.0485262	19.9835
10204	20070110	86.6667	0.011946	0.006083	0.002517	0.003345	0.04411	0.050264	20.9965
10206	20060119	93.3333	0.019243	0.010038	0.004001	0.005204	0.065953	0.0532532	18.037
10206	20070106	88.3333	0.021127	0.012126	0.004263	0.004738	0.068063	0.0536476	19.0007
10215	20080126	80	0.017275	0.009654	0.002736	0.004885	0.078207	0.0782848	16.0602
10218	20151215	75	0.014638	0.008572	0.002524	0.003541	0.041687	0.0786794	18.9349
10221	20071129	83.3333	0.016921	0.007862	0.004038	0.00502	0.059747	0.0355927	14.8802
10221	20081124	76.6667	0.020179	0.010314	0.003427	0.006439	0.072231	0.0398961	15.8686
10221	20100123	93.3333	0.016912	0.009377	0.003657	0.003878	0.056287	0.0417684	17.0322
10222	20060311	60	0.015681	0.00848	0.002993	0.004209	0.048386	0.0368887	17.1718
10223	20100402	66.6667	0.019426	0.011723	0.00279	0.004913	0.046889	0.0583263	14.2203
10226	20051208	70	0.019069	0.009936	0.004981	0.004151	0.073044	0.0669062	8.91987
10226	20070614	93.3333	0.014786	0.007569	0.003373	0.003844	0.07989	0.0691855	10.4339
10226	20100505	75	0.01994	0.010406	0.004994	0.00454	0.10948	0.149397	13.3251
10232	20070120	63.3333	0.019449	0.010235	0.003115	0.0061	0.103314	0.103362	11.0499
10233	20080223	75	0.017715	0.009366	0.003514	0.004835	0.055652	0.0526465	18.1437
10241	20060515	85	0.01513	0.008832	0.002467	0.003831	0.056393	0.0444045	15.3456
10241	20080327	80	0.015228	0.008996	0.002563	0.00367	0.062708	0.0407746	17.2128
10241	20100405	73.3333	0.014722	0.007502	0.002801	0.004419	0.053766	0.0481995	19.2361
10241	20111220	90	0.015317	0.009186	0.00256	0.003571	0.043428	0.0442132	20.9445
10241	20121218	86.6667	0.016175	0.009755	0.002933	0.003488	0.046864	0.0422374	21.9411
10241	20140109	78.3333	0.016381	0.00938	0.003018	0.003983	0.074989	0.0488164	23.0006
10241	20141013	85	0.015039	0.009495	0.002419	0.003125	0.050379	0.038533	23.759
10248	20090318	86.6667	0.015271	0.00807	0.003535	0.003666	0.069292	0.0496493	19.1978
10248	20120925	88.3333	0.017419	0.01007	0.002965	0.004383	0.0545	0.0455669	22.7214
10248	20130808	90	0.017412	0.01027	0.002767	0.004376	0.061161	0.0437601	23.5893
10248	20141022	91.6667	0.015784	0.008547	0.003445	0.003792	0.087753	0.0406775	24.7939
10248	20150611	83.3333	0.016686	0.009153	0.002944	0.004589	0.044142	0.0516849	25.4291
10252	20090513	68.3333	0.01167	0.006967	0.002519	0.002184	0.097063	0.072154	15.3402
10253	20120710	78.3333	0.011424	0.00607	0.00255	0.002804	0.053291	0.0445155	19.5181
10256	20080625	91.6667	0.016044	0.008774	0.003085	0.004185	0.081778	0.0661551	14.4586
10256	20100512	76.6667	0.01462	0.007747	0.002828	0.004045	0.046505	0.0495621	16.3367
10260	20070707	78.3333	0.02391	0.01392	0.004722	0.005268	0.097391	0.0386625	17.4976
10261	20060417	95	0.017103	0.008213	0.003789	0.005102	0.043908	0.0337728	18.2669
10263	20060826	68.3333	0.016271	0.009163	0.00344	0.003667	0.051673	0.0483568	20.6351
10263	20070924	90	0.021551	0.011074	0.00453	0.005946	0.063983	0.0903391	21.7138
10268	20060401	98.3333	0.014991	0.008583	0.003237	0.00317	0.044411	0.0389594	15.2252
10268	20070120	88.3333	0.016692	0.008175	0.003082	0.005435	0.044652	0.0436058	16.0301
10275	20060415	73.3333	0.018454	0.010107	0.003074	0.005273	0.070995	0.056261	9.27306
10275	20070623	63.3333	0.018	0.008063	0.00341	0.006527	0.098723	0.0661189	10.4613
10279	20130112	85	0.013402	0.006343	0.002935	0.004123	0.033145	0.0559786	30.0205
10279	20140118	90	0.01255	0.00612	0.002608	0.003822	0.035578	0.0548262	31.0363
10279	20150207	75	0.018815	0.011388	0.00295	0.004477	0.044637	0.0652312	32.0903
10282	20060508	81.6667	0.016411	0.008673	0.003195	0.004543	0.051509	0.0425832	18.3381
10288	20060720	81.6667	0.011732	0.005304	0.002682	0.003745	0.04432	0.0355374	17.5332
10288	20070411	65	0.01216	0.006658	0.001907	0.003594	0.059018	0.0466093	18.2587
10288	20090715	75	0.013327	0.006921	0.002619	0.003787	0.074884	0.0467411	20.5202
10288	20100518	83.3333	0.01427	0.007288	0.003129	0.003853	0.055116	0.0354614	21.3607
10300	20090617	88.3333	0.01339	0.006544	0.002834	0.004012	0.081619	0.0713254	14.4339
10300	20100616	85	0.013519	0.006778	0.003106	0.003635	0.07094	0.0335068	15.4305
10311	20070517	65	0.014284	0.008152	0.002431	0.0037	0.045389	0.0622156	21.3661
10311	20080514	98.3333	0.011786	0.006226	0.002262	0.003297	0.042046	0.049687	22.36
10311	20090420	76.6667	0.011555	0.006101	0.00252	0.002934	0.050074	0.0602703	23.2936
10311	20100908	81.6667	0.011209	0.006079	0.002026	0.003104	0.034929	0.0614945	24.6789
10311	20130819	78.3333	0.009484	0.004858	0.001958	0.002668	0.036329	0.0698324	27.6249
10311	20150120	95	0.010513	0.006271	0.001522	0.002721	0.052079	0.0598393	29.0458
10311	20160411	93.3333	0.009615	0.005199	0.001579	0.002838	0.050857	0.0729577	30.2696
10315	20070705	83.3333	0.015043	0.008536	0.003501	0.003007	0.048074	0.0512918	19.488
10315	20080728	81.6667	0.014585	0.008281	0.002658	0.003646	0.069486	0.0632652	20.553
10315	20090604	65	0.013511	0.00744	0.002461	0.00361	0.064083	0.0677599	21.4045
10315	20110119	70	0.017324	0.010855	0.003039	0.00343	0.052856	0.0418739	23.0308
10316	20070503	93.3333	0.015049	0.007783	0.00383	0.003437	0.088471	0.0637866	21.3087
10316	20080605	95	0.018155	0.010538	0.003027	0.00459	0.058856	0.0445924	22.4011
10316	20090514	96.6667	0.01685	0.00926	0.003494	0.004096	0.092926	0.0948322	23.3401
10316	20100614	93.3333	0.01682	0.009482	0.003506	0.003832	0.084694	0.0688741	24.4243
10316	20120711	81.6667	0.017383	0.010835	0.002694	0.003854	0.082148	0.0874157	26.4996
10316	20130730	93.3333	0.012113	0.007387	0.002268	0.002457	0.04865	0.0643259	27.551
10316	20140506	93.3333	0.012391	0.007265	0.002547	0.002579	0.135586	0.0914705	28.3176
10323	20060713	93.3333	0.014594	0.008071	0.003043	0.003479	0.061118	0.0545189	26.5215
10329	20070703	85	0.014843	0.008755	0.0025	0.003588	0.085122	0.0784808	17.4894
10329	20081112	90	0.014298	0.006515	0.00282	0.004963	0.048336	0.0520005	18.8528
10329	20121015	100	0.016218	0.00952	0.00331	0.003387	0.102321	0.0813805	22.7762
10329	20130904	98.3333	0.01549	0.008148	0.002869	0.004473	0.048597	0.0715388	23.6632
10333	20060729	90	0.013274	0.007104	0.002668	0.003502	0.035271	0.0470492	19.5647
10333	20070714	96.6667	0.012787	0.006645	0.002541	0.003601	0.033446	0.038948	20.5229
10333	20090917	93.3333	0.014208	0.007981	0.002951	0.003277	0.043076	0.0479269	22.7023
10335	20081013	85	0.020178	0.011278	0.003597	0.005303	0.071161	0.0658392	12.7638
10335	20090624	80	0.02096	0.01017	0.003888	0.006903	0.099693	0.060747	13.4592
10335	20100526	85	0.021496	0.012379	0.004036	0.005082	0.100075	0.0861584	14.3792
10336	20060824	68.3333	0.021065	0.012864	0.003284	0.004917	0.116397	0.108529	13.6262
10342	20060810	85	0.012941	0.007223	0.002075	0.003643	0.032429	0.0537111	27.5784
10343	20060909	60	0.017092	0.010027	0.003904	0.003162	0.058994	0.058588	12.679
10343	20071018	90	0.016244	0.007826	0.002772	0.005646	0.077336	0.064005	13.7851
10344	20060909	75	0.018612	0.010954	0.003695	0.003963	0.043513	0.047625	16.679
10344	20081204	63.3333	0.016918	0.008373	0.004034	0.004511	0.054193	0.047448	18.9158
10344	20090908	73.3333	0.020733	0.011566	0.004017	0.00515	0.068915	0.0442369	19.6769
10344	20101214	81.6667	0.014971	0.008094	0.003352	0.003526	0.051974	0.0427205	20.9418
10344	20120717	71.6667	0.017711	0.011376	0.003301	0.003034	0.050872	0.0610827	22.5325
10345	20060914	86.6667	0.019741	0.008723	0.004146	0.006873	0.09804	0.0941841	10.683
10357	20060907	98.3333	0.016916	0.008737	0.002888	0.005291	0.047895	0.0350817	20.6653
10358	20070214	88.3333	0.012352	0.007078	0.002354	0.00292	0.048352	0.036907	22.1136
10358	20070919	85	0.012999	0.007391	0.002473	0.003135	0.078674	0.0531668	22.7077
10358	20090328	81.6667	0.011302	0.006113	0.00229	0.002899	0.054239	0.0346104	24.2299
10358	20091207	93.3333	0.013686	0.007739	0.002402	0.003545	0.065608	0.0360593	24.9254
10358	20120414	83.3333	0.014938	0.008461	0.002761	0.003716	0.056681	0.0454542	27.2772
10358	20130612	78.3333	0.013631	0.007749	0.002476	0.003406	0.063118	0.0339421	28.438
10359	20061023	71.6667	0.017555	0.010921	0.002932	0.003702	0.085268	0.0670408	20.7939
10359	20070912	73.3333	0.01529	0.009149	0.002386	0.003756	0.056255	0.0569164	21.681
10359	20091217	85	0.013513	0.006966	0.002501	0.004046	0.04821	0.0442741	23.9452
10359	20121030	81.6667	0.012954	0.007202	0.002279	0.003474	0.038122	0.0456265	26.8145
10359	20131001	96.6667	0.01412	0.007279	0.002548	0.004293	0.04337	0.0492839	27.7344
10359	20141013	85	0.013712	0.008045	0.002065	0.003601	0.035965	0.0466354	28.7666
10359	20150511	88.3333	0.01231	0.006568	0.002423	0.003319	0.03775	0.052419	29.3415
10360	20061111	75	0.013607	0.006204	0.002614	0.004789	0.075992	0.0752088	8.83774
10361	20061111	81.6667	0.010917	0.00492	0.0026	0.003397	0.080639	0.0983771	11.8412
10368	20071217	85	0.015947	0.008641	0.002656	0.004651	0.088779	0.100685	17.9329
10368	20081120	93.3333	0.018068	0.00871	0.003604	0.005754	0.065628	0.0501436	18.861
10368	20091124	78.3333	0.017546	0.009826	0.002827	0.004893	0.074911	0.0545975	19.8713
10368	20101123	90	0.018377	0.010099	0.003153	0.005125	0.063649	0.0462705	20.8679
10368	20121017	78.3333	0.01999	0.010955	0.002658	0.006377	0.066333	0.0816756	22.7679
10370	20091201	78.3333	0.02075	0.012784	0.004379	0.003587	0.079829	0.0789199	13.8973
10370	20101120	83.3333	0.016596	0.008055	0.002471	0.00607	0.096268	0.0603336	14.8665
10385	20061114	85	0.014228	0.007622	0.002795	0.003812	0.039603	0.0438938	18.8583
10385	20071114	86.6667	0.015703	0.00879	0.003419	0.003493	0.056865	0.0526819	19.8576
10385	20081217	93.3333	0.015508	0.008031	0.003107	0.00437	0.05457	0.0445003	20.95
10385	20091125	88.3333	0.013998	0.007452	0.002686	0.00386	0.044469	0.0384989	21.8891
10385	20110129	86.6667	0.015497	0.007901	0.00332	0.004276	0.038021	0.0479231	23.0663
10385	20120414	83.3333	0.016981	0.010141	0.002948	0.003893	0.036248	0.0466021	24.2737
10385	20130323	83.3333	0.013774	0.007023	0.002997	0.003754	0.058726	0.0544399	25.2128
10385	20140405	91.6667	0.016289	0.008638	0.002852	0.004799	0.054379	0.0545429	26.2477
10385	20150505	90	0.014765	0.008197	0.003352	0.003216	0.04913	0.0789499	27.3292
10406	20090611	91.6667	0.015357	0.007962	0.003835	0.00356	0.045768	0.0435262	16.4243
10406	20110314	91.6667	0.015347	0.008112	0.003112	0.004124	0.035991	0.0456544	18.1793
10406	20120806	76.6667	0.014609	0.007986	0.002508	0.004115	0.035701	0.0531212	19.5783
10406	20130808	78.3333	0.013752	0.007284	0.002876	0.003592	0.04438	0.0564755	20.5831
10408	20070407	61.6667	0.015884	0.007804	0.002397	0.005683	0.076177	0.0980955	14.2505
10408	20080522	75	0.014642	0.007508	0.002776	0.004358	0.078751	0.078459	15.3758
10408	20090623	80	0.013684	0.005437	0.003623	0.004624	0.074608	0.0625751	16.4627
10409	20070314	95	0.016492	0.008099	0.002579	0.005815	0.046532	0.0496296	17.18
10409	20100420	88.3333	0.018889	0.010379	0.00251	0.006	0.044161	0.0447663	20.2819
10443	20070730	98.3333	0.011154	0.00604	0.002174	0.002939	0.034423	0.0484621	14.5708
10451	20070816	70	0.017777	0.010265	0.003235	0.004277	0.045005	0.0570112	15.6194
10451	20090115	86.6667	0.015362	0.007781	0.003246	0.004335	0.052975	0.0417567	17.0376
10470	20071015	81.6667	0.017679	0.010882	0.002663	0.004134	0.08835	0.10901	16.7584
10470	20131009	98.3333	0.013055	0.007368	0.002483	0.003204	0.053318	0.0633707	22.7433
10470	20141014	83.3333	0.014271	0.009513	0.002274	0.002485	0.152278	0.0696151	23.7563
10472	20100630	88.3333	0.01061	0.004659	0.002144	0.003806	0.099851	0.0854973	14.475
10472	20101012	73.3333	0.012872	0.005244	0.002688	0.004941	0.121131	0.0819473	14.7597
10479	20101120	73.3333	0.01488	0.007728	0.003274	0.003879	0.088321	0.0785616	12.8788
10480	20101023	81.6667	0.01894	0.010589	0.003694	0.004657	0.10286	0.0490587	13.8069
10483	20071215	78.3333	0.018939	0.011047	0.003735	0.004157	0.059871	0.0520909	15.937
10489	20071112	75	0.01835	0.010048	0.003249	0.005053	0.077135	0.0442897	17.8316
10489	20081209	86.6667	0.018343	0.011717	0.00286	0.003766	0.093241	0.102237	18.9075
10489	20100107	76.6667	0.018671	0.010111	0.003152	0.005409	0.052735	0.0441302	19.9863
10500	20080115	81.6667	0.014314	0.007356	0.003823	0.003135	0.078957	0.109012	14.0314
10500	20090425	65	0.017561	0.009405	0.003085	0.005071	0.075512	0.0885073	15.3073
10500	20100508	88.3333	0.014335	0.006708	0.003559	0.004068	0.059558	0.0567386	16.3422
10527	20160109	91.6667	0.016447	0.009087	0.002937	0.004422	0.037362	0.0583172	16.0219
10529	20080219	75	0.013822	0.007449	0.002648	0.003725	0.0829	0.0724107	16.1177
10613	20100225	83.3333	0.014896	0.007999	0.003233	0.003663	0.052625	0.0565556	27.132
10622	20100329	75	0.01493	0.009067	0.002445	0.003417	0.052347	0.0512623	27.2389
10686	20100519	90	0.016377	0.008927	0.002971	0.00448	0.050413	0.0419917	17.3607
10699	20100522	86.6667	0.014288	0.007345	0.002481	0.004462	0.033234	0.0406136	16.3805
10699	20111217	88.3333	0.016138	0.008196	0.003269	0.004673	0.050767	0.05021	17.9521
10699	20130108	85	0.015246	0.008462	0.002645	0.00414	0.037652	0.0393069	19.0143
10703	20100202	76.6667	0.016758	0.009906	0.003103	0.003749	0.065872	0.0508975	16.0766
10760	20100622	75	0.017666	0.009584	0.002858	0.005225	0.068348	0.0661768	13.4483
10767	20110613	73.3333	0.017095	0.010061	0.003554	0.003479	0.077254	0.0789473	12.4408
10785	20100303	80	0.016588	0.009514	0.002797	0.004277	0.039916	0.0467954	29.1362
10793	20100310	88.3333	0.014012	0.006446	0.003466	0.0041	0.061923	0.0486678	27.1704
10799	20100313	85	0.01227	0.006718	0.002148	0.003404	0.027506	0.0349578	28.1697
10816	20100429	80	0.009953	0.005308	0.002218	0.002427	0.033627	0.0541639	19.3101
10816	20121212	88.3333	0.009208	0.004384	0.001926	0.002898	0.039002	0.0617144	21.9329
10816	20140108	85	0.012097	0.006591	0.002191	0.003315	0.085077	0.0491239	23.0062
10816	20150212	86.6667	0.013917	0.008058	0.002504	0.003354	0.05852	0.11125	24.1013
10825	20100609	76.6667	0.018125	0.009532	0.003641	0.004952	0.065996	0.0784707	17.4045
10847	20101204	85	0.015987	0.008327	0.002969	0.004692	0.055166	0.0562076	14.924
10869	20101208	68.3333	0.021175	0.012924	0.002874	0.005377	0.057455	0.0746175	15.9206
10878	20110226	98.3333	0.019321	0.010714	0.004256	0.00435	0.062819	0.0406532	15.154
10895	20131126	83.3333	0.01714	0.010397	0.002676	0.004066	0.051346	0.061612	21.8918
10895	20160406	86.6667	0.011438	0.004417	0.002723	0.004299	0.031367	0.039084	24.2519
10927	20121110	76.6667	0.016872	0.00936	0.002665	0.004847	0.05823	0.0341342	21.8425
11052	20121016	86.6667	0.017094	0.010017	0.002704	0.004372	0.031305	0.0454071	29.7604
11052	20130924	83.3333	0.016993	0.010501	0.002935	0.003556	0.104227	0.0442863	30.6995
11054	20131119	86.6667	0.017049	0.009488	0.003359	0.004203	0.080778	0.075214	24.8569
11072	20121120	90	0.018355	0.009764	0.003556	0.005035	0.040862	0.0468223	27.8658
11090	20140102	95	0.013104	0.007164	0.002293	0.003647	0.043302	0.0513264	22.9952
11090	20150727	88.3333	0.0136	0.00733	0.002212	0.004057	0.043526	0.0618514	24.5585
11111	20140514	93.3333	0.009702	0.005321	0.001703	0.002678	0.092416	0.0754459	27.3484
11111	20150511	91.6667	0.01155	0.005812	0.002685	0.003054	0.026572	0.0510858	28.3395
11111	20160503	93.3333	0.013679	0.008096	0.002626	0.002957	0.033709	0.0576469	29.3196
11116	20130130	76.6667	0.019254	0.010993	0.003982	0.004278	0.079109	0.0722813	23.0691
11116	20140129	83.3333	0.012734	0.006431	0.002999	0.003304	0.071825	0.0571448	24.0657
11151	20130422	81.6667	0.015119	0.008457	0.002577	0.004084	0.072852	0.10603	22.2806
11183	20150902	88.3333	0.01444	0.008882	0.002734	0.002824	0.036891	0.0908363	32.6653
11214	20131022	86.6667	0.012361	0.007579	0.002149	0.002634	0.076624	0.0380385	21.7769
11214	20141204	80	0.016658	0.009344	0.003465	0.003849	0.061309	0.0338336	22.8939
11216	20131024	81.6667	0.015553	0.008806	0.002844	0.003903	0.080337	0.0510101	22.7981
11216	20140910	83.3333	0.014144	0.007414	0.003007	0.003722	0.103537	0.0681554	23.6769
11216	20150513	93.3333	0.016769	0.009944	0.002937	0.003888	0.050954	0.0783186	24.3477
11217	20131022	93.3333	0.018232	0.010098	0.003492	0.004642	0.051452	0.0277779	19.7919
11217	20141203	85	0.016046	0.009835	0.002697	0.003515	0.061889	0.0553274	20.9062
11217	20151012	93.3333	0.015101	0.008075	0.002794	0.004232	0.066548	0.0554911	21.7632
